# Supplementary material for: DRAXIN regulates interhemispheric fissure remodelling to influence the extent of corpus callosum formation
Source: eLife. 2021 May 4;10:e61618. doi: 10.7554/eLife.61618 (PMC8137145; doi:10.7554/eLife.61618)
Supplement: Figure 1—source data 1. [file elife-61618-fig1-data1.xlsx]

## Sheet: Sheet1
Figure 1: Distribution of commissural size in BTBR x C57 N2 mice						pCCD = partial corpus callosum dysgenesis
						cCCD = complete corpus callosum dysgenesis
1B: Frequency of corpus callosum phenotypes
	Normal	pCCD	cCCD
Frequency	69	15	28
Corpus callosum anteroposterior length (cm) in BTBR N2 mice.						Figure 1C and D: HC length (mm) in BTBR N2 mice.
cCCD	pCCD	Normal				cCCD	pCCD	Normal
0	2.91	3.40667				1.546	1.367	1.314
0	1.08	3.74333				1.358	1.2	1.583
0	1.37	3.92				1.113	1.334	1.221
0	2.04	3.63333				1.62	1.504	1.476
0	1.45	3.61667				1.164	1.294	1.731
0	2.042	3.88333				1.446	1.396	1.726
0	1.566	3.81333				1.38	1.484	1.44
0	1.63	3.93				0.809	1.442	1.42
0	2.965	3.01				0.816	1.354	1.367
0	1.66	3.62				1.307	1.211	1.334
0	2.973	3.66				1.608	1.388	1.392
0	2.411	3.72				1.321	1.336	1.674
0	1.656	3.8				1.421	1.016	1.742
0	1.855	3.92				0.821	1.439	1.588
0	2.203	3.91				0.537	1.203	1.629
0		3.81				1.213		1.43
0		3.38				1.328		1.346
0		3.75				1.379		1.438
0		3.88				0.988		1.599
0		3.981				0.588		1.421
0		3.919				1.304		1.689
0		3.943				1.317		1.458
0		3.901				0.708		1.7674
0		3.864				0.664		1.553
0		3.953				1.092		1.457
0		3.87				1.385		1.395
0		3.886				0.522		1.313
0		3.748						1.502
		3.516						1.421
		3.747						1.419
		3.901						1.348
		3.8						1.663
		3.84						1.291
		3.813						1.435
		3.649						1.439
		3.405						1.239
		3.752						1.43
		3.913						1.382
		3.914						1.319
		3.88						1.413
		4.02						1.547
		3.854						1.638
		3.636						1.569
		3.945						1.384
		3.269						1.532
		3.715						1.169
		4.053						1.512
		3.779						1.327
		3.9						1.611
		3.672						1.405
		3.672						1.47
		3.55						0.951
		4.016						1.49
		3.587						1.505
		3.695						1.264
		3.587						1.421
		3.81						1.505
		3.662						1.465
		3.783						1.455
		3.985						1.538
		3.91						1.411
		3.983						1.352
		3.71						1.478
		4.018						1.787
		3.757						1.585
		3.41						1.426
		3.969
		3.92
		3.674
