# Supplementary material for: DRAXIN regulates interhemispheric fissure remodelling to influence the extent of corpus callosum formation
Source: eLife. 2021 May 4;10:e61618. doi: 10.7554/eLife.61618 (PMC8137145; doi:10.7554/eLife.61618)
Supplement: Figure 3—figure supplement 1—source data 1. [file elife-61618-fig3-figsupp1-data1.xlsx]

## Sheet: Sheet1
Figure 3-figure supplement 1D: Ratio fused septum length / total midline length in control and pCCD humans
								pCCD = partial corpus callosum dysgenesis
								CC = corpus callosum
Ratio fused septum control	Ratio fused septum pCCD
0.121791	0
0.0895138	0.147626
0.156317	0
0.134233	0
0.198135	0
0.169293	0
0.103542
0.205593
0.153327
