# Supplementary material for: DRAXIN regulates interhemispheric fissure remodelling to influence the extent of corpus callosum formation
Source: eLife. 2021 May 4;10:e61618. doi: 10.7554/eLife.61618 (PMC8137145; doi:10.7554/eLife.61618)
Supplement: Figure 3—source data 1. [file elife-61618-fig3-data1.xlsx]

## Sheet: 3D
Figure 3D: Ratio dorso-ventral IHF length / total midline length in control and pCCD humans								pCCD = partial corpus callosum dysgenesis
								IHF = interhemispheric fissure
Control IHF length ratio	pCCD IHF length ratio
0.344158	0.4737
0.394046	0.409264
0.391245	0.476554
0.38057	0.70858
0.364558	0.414562
0.399964	0.700055
0.388169	0.358527
0.40729	0.723772
0.366333	0.466963
	0.637514
Figure 3E: Ratio dorso-ventral CC length / total midline length in control and pCCD humans								pCCD = partial corpus callosum dysgenesis
								CC = corpus callosum
Control CC length ratio	pCCD CC length ratio
0.0649452	0.0601
0.0694909	0.0579234
0.0738123	0.0499956
0.0485263	0
0.080242	0.0664141
0.0474258	0
0.0625656	0.049182
0.0562599	0
0.0627523	0.059216
	0

## Sheet: 3E
Figure 3E: Ratio dorso-ventral CC length / total midline length in control and pCCD humans								pCCD = partial corpus callosum dysgenesis
								CC = corpus callosum
Control CC length ratio	pCCD CC length ratio
0.064945	0.0601
0.069491	0.057923
0.073812	0.049996
0.048526	0
0.080242	0.066414
0.047426	0
0.062566	0.049182
0.05626	0
0.062752	0.059216
	0

## Sheet: 3G-H
Figure 3G and 3H: Ratio anterior-posterior IHF length / total midline length in control and pCCD humans								pCCD = partial corpus callosum dysgenesis
								IHF = interhemispheric fissure
Control IHF length ratio anterior segment	pCCD IHF length ratio anterior segment	Control IHF length ratio posterior segment	pCCD IHF length ratio posterior segment
0.243643	0.337308	0.314821	0.629159
0.223814	0.240798	0.371365	0.471719
0.272071	0.34257	0.385394	0.446801
0.299679	0.355402	0.316378	0.631199
0.235058	0.33166	0.345641	0.645546
0.221963	0.256989	0.334049	0.679189
0.246694	0.411002	0.348052	0.539008
0.253442	0.297939	0.35171	0.671093
0.22892		0.334009

## Sheet: 3I-J
Figure 3I and J: Ratio anterior-posterior CC length / total midline length in control and pCCD humans								pCCD = partial corpus callosum dysgenesis
								CC = corpus callosum
Control CC length ratio anterior segment	pCCD CC length ratio anterior segment	Control CC length ratio posterior segment	pCCD CC length ratio posterior segment
0.0735176	0.0383407	0.0873099	0
0.102884	0.0564957	0.0693687	0
0.0504185	0.0595849	0.0529158	0.0297639
0.0360308	0	0.0671163	0
0.0668066	0.0150964	0.0668684	0
0.064075	0.0179092	0.0823472	0
0.0660567	0.0634521	0.081523	0
0.0548247	0.0250872	0.0982684	0
0.0861196	0.042282	0.0799279	0
	0		0
