# Supplementary material for: DRAXIN regulates interhemispheric fissure remodelling to influence the extent of corpus callosum formation
Source: eLife. 2021 May 4;10:e61618. doi: 10.7554/eLife.61618 (PMC8137145; doi:10.7554/eLife.61618)
Supplement: Figure 5—source data 1. [file elife-61618-fig5-data1.xlsx]

## Sheet: Figure 5A-D
Figure 5A-D: Commissure size in BTBR N2 mice based on genotype for chromosome 4 SNP				Hom = homozygous		Het = Heterozygous		CC = corpus callosum
								HC = hippocampal commissure
Chr4 Hom CC length (mm)	Chr4 Het CC length (mm)	Chr4 Hom HC length (mm)	Chr4 Het HC length (mm)	Chr4 Hom AC area (mm^2)	Chr4 Het AC area (mm^2)			AC = anterior commissure
3.74333	3.63333	1.583	1.476	0.11158	0.143286			Chr4 = chromosome 4
0	3.62	1.62	1.334	0.202835	0.0951587
3.92	3.901	1.221	1.348	0.185483	0.143897
0	2.965	1.38	1.354	0.164863	0.102124
1.37	4.053	1.334	1.512	0.0975171	0.15208
2.04	1.66	1.504	1.211	0.152253	0.119128
1.45	3.91	1.294	1.455	0.0864941	0.159639
2.042	4.018	1.396	1.411	0.0722119	0.156877
1.566	3.757	1.484	1.352	0.141565	0.177184
1.63	3.92	1.442	1.585	0.146569	0.145542
0		0.988		0.110298
0		0.588		0.132898
0		1.304		0.121526
0		1.317		0.119831
1.855		1.439		0.131206
2.411		1.336		0.134429
0		0.664		0.122654
0		1.092		0.155701
0		0.708		0.152131
0		1.385		0.13688
2.203		1.203		0.156665

## Sheet: Figure 5E-H
Figure 5E-H: Commissure size in BTBR N2 mice based on genotype for chromosome 9 SNP						Hom = homozygous		Het = Heterozygous		CC = corpus callosum
										HC = hippocampal commissure
Chr9 Hom CC length (mm)	Chr9 Het CC length (mm)	Chr9 Hom HC length (mm)	Chr9 Het HC length (mm)	Chr9 Hom AC area (mm^2)	Chr9 Het AC area (mm^2)			AC = anterior commissure
3.74333	1.45	1.583	1.294	0.11158	0.0864941			Chr9 = chromosome 9
0	2.042	1.62	1.396	0.202835	0.0722119
3.92	3.901	1.221	1.348	0.185483	0.143897
3.63333	1.566	1.476	1.484	0.143286	0.141565
0	2.965	1.38	1.354	0.164863	0.102124
3.62	4.053	1.334	1.512	0.0951587	0.15208
1.37	1.66	1.334	1.211	0.0975171	0.119128
2.04	0	1.504	0.588	0.152253	0.132898
1.63	0	1.442	1.304	0.146569	0.121526
0	3.91	0.988	1.455	0.110298	0.159639
0	2.411	1.317	1.336	0.119831	0.134429
1.855	0	1.439	0.708	0.131206	0.152131
4.018	3.92	1.411	1.585	0.156877	0.145542
0	0	0.664	1.385	0.122654	0.13688
0	2.203	1.092	1.203	0.155701	0.156665
3.757		1.352		0.177184

## Sheet: Figure 5I-L
Figure 5I-L: Commissure size in BTBR N2 mice based on genotype for chromosome 15 SNP						Hom = homozygous		Het = Heterozygous		CC = corpus callosum
										HC = hippocampal commissure
Chr15 Hom CC length (mm)	Chr15 Het CC length (mm)	Chr15 Hom HC length (mm)	Chr15 Het HC length (mm)	Chr15 Hom AC area (mm^2)	Chr15 Het AC area (mm^2)			AC = anterior commissure
3.74333	3.92	1.583	1.221	0.11158	0.185483			Chr15 = chromosome 15
0	3.63333	1.62	1.476	0.202835	0.143286
3.62	0	1.334	1.38	0.0951587	0.164863
1.37	3.901	1.334	1.348	0.0975171	0.143897
2.04	1.63	1.504	1.442	0.152253	0.146569
1.45	4.053	1.294	1.512	0.0864941	0.15208
2.042	0	1.396	0.988	0.0722119	0.110298
1.566	1.66	1.484	1.211	0.141565	0.119128
2.965	0	1.354	0.588	0.102124	0.132898
4.018	0	1.411	1.304	0.156877	0.121526
2.411	0	1.336	1.317	0.134429	0.119831
0	3.91	0.664	1.455	0.122654	0.159639
0	1.855	0.708	1.439	0.152131	0.131206
3.757	0	1.352	1.092	0.177184	0.155701
3.92	0	1.585	1.385	0.145542	0.13688
	2.203		1.203		0.156665

## Sheet: Figure 5M-P
Figure 5M-P: Commissure size in BTBR N2 mice based on Draxin mutant allele genotype						Het = Heterozygous		CC = corpus callosum
						Hom = homozygous		HC = hippocampal commissure
Draxin deletion Hom CC length (mm)	Draxin deletion Het CC length (mm)	Draxin deletion Hom HC length (mm)	Draxin deletion Het HC length (mm)	Draxin deletionHom AC area (mm^2)	Draxin deletion Het AC area (mm^2)			AC = anterior commissure
0	3.40667	1.546	1.314	0.0610718	0.16375
0	3.63333	1.358	1.476	0.0882886	0.143286
0	3.61667	1.113	1.731	0.155311	0.173291
0	3.88333	1.62	1.726	0.202835	0.101731
0	3.81333	1.164	1.44	0.156467	0.188267
3.92	3.01	1.221	1.38	0.185483	0.164863
2.91	1.08	1.446	1.367	0.172148	0.117837
0	3.62	1.367	1.2	0.142109	0.0951587
3.93	3.66	0.809	1.334	0.0824097	0.0882788
2.04	3.72	0.816	1.392	0.171597	0.106675
3.81	3.8	1.42	1.674	0.152253	0.11467
3.75	3.92	1.504	1.742	0.140886	0.137102
3.981	1.37	1.43	1.588	0.124797	0.0975171
1.45	3.91	1.438	1.334	0.158237	0.128237
0	3.38	1.421	1.629	0.0864941	0.134751
0	3.88	1.294	1.346	0.108337	0.0732861
0	3.919	1.307	1.599	0.135298	0.173672
0	3.943	1.553	1.689	0.153936	0.17104
3.864	3.901	1.457	1.458	0.154653	0.138721
3.953	3.87	1.321	1.7674	0.112166	0.155698
0	3.886	1.421	1.395	0.20699	0.152068
0	3.748	0.537	1.313	0.165796	0.141445
0	3.516	1.328	1.502	0.175164	0.122368
0	3.747	1.379	1.421	0.126089	0.141464
0	3.8	1.388	1.419	0.188787	0.141565
2.973	3.84	1.478	1.663	0.140037	0.142856
3.55	1.566	0.522	1.291	0.172749	0.146753
3.41	3.649		1.484	0.13221	0.140879
0	3.752		1.439		0.239639
	4.02		1.43		0.126753
	3.854		1.547		0.149795
	3.672		1.638		0.181514
	3.672		1.405		0.184102
	4.016		1.47		0.14134
	3.587		0.951		0.153931
	3.587		1.49
	3.81		1.505
	3.985		1.264
	3.983		1.465
