# Supplementary material for: DRAXIN regulates interhemispheric fissure remodelling to influence the extent of corpus callosum formation
Source: eLife. 2021 May 4;10:e61618. doi: 10.7554/eLife.61618 (PMC8137145; doi:10.7554/eLife.61618)
Supplement: Figure 7—source data 1. [file elife-61618-fig7-data1.xlsx]

## Sheet: Figure 7B
Figure 7B: Ratio of IHF / total midline length in E17 BTBR and C57 mice.
C57 ventral horizontal IHF length ratio	BTBR ventral horizontal IHF length ratio	C57 middle horizontal IHF length ratio	BTBR middle horizontal IHF length ratio	C57 dorsal horizontal IHF length ratio	BTBR dorsal horizontal IHF length ratio
0.580294	0.739004	0.568466	1	0.704617	1
0.719766	0.777348	0.596117	0.82655	0.765567	1
0.636874	0.7095	0.533294	0.813931	0.669774	1
0.679505	0.850834	0.467498	0.894037	0.578403	1
0.67865	0.71546	0.513355	0.82962	0.608022	1
0.71494	0.763663	0.575556	0.803187	0.769833	1

## Sheet: Figure 7E
Figure 7E: Ratio of IHF width at the base / IHF width at the CSB						CSB = corticoseptal boundary
						IHF = interhemispheric fissure
C57 IHF width at the CSB	BTBR IHF width at the CSB	C57 IHF width at the base	BTBR IHF width at the base	C57 Ratio of IHF width	BTBR Ratio of IHF width
29.468	36.099	3.684	29.468	0.125017	0.816311
39.604	56.726	3.967	64.38	0.100167	1.13493
30.205	39.045	4.052	37.572	0.13415	0.962274
29.284	40.519	2.97	41.992	0.101421	1.03635
30.205	36.099	2.947	44.945	0.0975666	1.24505
34.088	43.472	3.315	80.304	0.0972483	1.84726
32.415		4.805		0.148234

## Sheet: Figure 7G
Figure 7G: NESTIN fluorescence intensity lateral to the IHF 100-200 micron from the IHF base
Distance (microns)	C57 NESTIN IF n1	C57 NESTIN IF n2	C57 NESTIN IF n3	C57 NESTIN IF n4	C57 NESTIN IF n5	C57 NESTIN IF n6	C57 NESTIN IF n7	BTBR NESTIN IF n1	BTBR NESTIN IF n2	BTBR NESTIN IF n3	BTBR NESTIN IF n4	BTBR NESTIN IF n5	BTBR NESTIN IF n6		C57Bl/6 mean	C57Bl/6 Std.s	C57Bl/6 SEM	C57Bl/6 mean + SEM	C57Bl/6 mean - SEM		BTBR mean	BTBR Std s	BTBR SEM	BTBR mean + SEM	BTBR mean - SEM
0	1383.19	2290.34	953.15	942.917	2297.92	1098.04	1117.09	1450.68	1666.54	1225.43	1048.12	1278.66	1766.51		1440.38	601.062	227.18	1667.56	1213.2		1405.99	274.499	112.064	1518.05	1293.93
0.5525	1609.43	2510.63	1101.42	1066.42	2472.84	1024.38	1168.58	1444.67	1514.63	1191.43	1254.77	1331.37	1777.93		1564.82	662.48	250.394	1815.21	1314.42		1419.14	212.165	86.616	1505.75	1332.52
1.1051	1921.63	2554	1221.01	1256.26	2284.71	977.322	1233.87	1432.38	1422.04	1231.97	1485.86	1343.83	1727.13		1635.54	613.339	231.82	1867.36	1403.72		1440.53	165.802	67.6885	1508.22	1372.85
1.6576	2085.2	2419.17	1351.28	1470.93	2005.74	930.444	1254.67	1366.78	1478.01	1271.53	1588.03	1315.27	1625.14		1645.35	532.724	201.351	1846.7	1444		1440.8	146.241	59.7025	1500.5	1381.09
2.2101	2146.4	2259.12	1506.71	1712.91	1857.25	936.967	1237.04	1262.96	1515.08	1270.56	1700.63	1308.09	1505.87		1665.2	476.483	180.093	1845.29	1485.11		1427.2	175.713	71.7346	1498.93	1355.46
2.7627	2029.92	2141.57	1764.45	1948.56	1751.81	997.383	1238.27	1169.46	1476.81	1277.68	1815.52	1365.23	1362.18		1695.99	424.107	160.297	1856.29	1535.7		1411.15	222.96	91.0232	1502.17	1320.12
3.3152	2033.65	1998.27	1967.49	1965.69	1677.88	1062.74	1248.66	1108.21	1392.22	1290.28	1791.23	1394.95	1230.09		1707.77	398.393	150.578	1858.35	1557.19		1367.83	233.663	95.3925	1463.22	1272.44
3.8677	2326.85	1848.37	2020.26	1904.56	1663.62	1095.28	1261.46	1064.94	1359.78	1233.05	1682.09	1378.99	1170.84		1731.48	430.456	162.697	1894.18	1568.79		1314.95	214.889	87.7281	1402.68	1227.22
4.4202	2699.44	1688.23	2001.21	1854.13	1640.03	1133.63	1280.77	1020.34	1344.94	1151.67	1583.27	1414.57	1162.22		1756.78	514.953	194.634	1951.41	1562.14		1279.5	205.944	84.0761	1363.58	1195.43
4.9728	2697.09	1604.55	2021.09	1739.08	1593.01	1218.1	1311.13	1014.99	1324.36	1085.76	1528.26	1470.26	1160.91		1740.58	498.547	188.433	1929.01	1552.15		1264.09	209.961	85.7163	1349.8	1178.37
5.5253	2368.01	1650.03	1902.05	1609.48	1501.57	1311.93	1327.94	1039.66	1299.98	1058.08	1479.56	1494.77	1149.84		1667.29	369.382	139.613	1806.9	1527.67		1253.65	203.045	82.8927	1336.54	1170.76
6.0778	2075.07	1767.14	1697.36	1545.38	1425.26	1352.97	1312.53	1087.91	1342.12	1066.44	1449.27	1487.43	1133.29		1596.53	270.863	102.377	1698.91	1494.15		1261.08	188.372	76.9027	1337.98	1184.17
6.6304	1863.77	1836.12	1521.79	1484.04	1350.54	1285.68	1293.6	1122.4	1413.24	1056.91	1416.66	1459.69	1130.84		1519.36	242.995	91.8435	1611.21	1427.52		1266.62	181.384	74.0497	1340.67	1192.57
7.1829	1799.29	1811.59	1426.58	1386.51	1353.28	1190.46	1300.07	1119.13	1442.45	1073.11	1379.45	1415.57	1100.04		1466.83	243.086	91.8778	1558.7	1374.95		1254.96	174.337	71.1727	1326.13	1183.79
7.7354	1858.66	1753.19	1432.4	1292.32	1357.04	1134.43	1301.89	1075.64	1469.82	1132.26	1356.36	1322.17	1070.78		1447.13	262.743	99.3075	1546.44	1347.83		1237.84	167.535	68.3957	1306.23	1169.44
8.288	1836.95	1728.99	1460.52	1236.39	1406.83	1134.72	1260.87	1016.84	1492.5	1204.09	1364.74	1220.08	1044.41		1437.9	261.187	98.7196	1536.61	1339.18		1223.78	183.02	74.7177	1298.49	1149.06
8.8405	1795.18	1737.47	1441.02	1239.86	1481.45	1132.16	1208.87	956.267	1493.25	1246.28	1380.42	1169.87	1034.15		1433.72	259.591	98.1163	1531.83	1335.6		1213.37	203.684	83.1538	1296.53	1130.22
9.393	1794.06	1740.42	1409.66	1239.61	1536.25	1113.12	1163.06	931.528	1507.54	1248.69	1351.91	1115.96	1036.41		1428.02	273.403	103.337	1531.36	1324.69		1198.67	212.567	86.7803	1285.45	1111.89
9.9455	1836.41	1749.93	1344.82	1233.09	1518.12	1099.72	1118.51	920.183	1505.1	1212.87	1294.43	1063.65	1030.59		1414.37	296.006	111.88	1526.25	1302.49		1171.14	211.073	86.1701	1257.31	1084.97
10.4981	1831.33	1771.34	1268.04	1234.61	1399.38	1103.71	1067.02	920.206	1450	1177.28	1231.67	1019.35	998.133		1382.2	306.907	116	1498.2	1266.2		1132.77	194.202	79.2824	1212.05	1053.49
11.0506	1811.27	1758.79	1280.13	1253.81	1287.07	1103.31	1058.16	944.233	1414.53	1176.15	1205.43	1010.13	958.961		1364.65	300.693	113.651	1478.3	1251		1118.24	182.252	74.4041	1192.64	1043.83
11.6031	1861.1	1739.92	1320.76	1333.99	1191.46	1078.81	1049.56	975.217	1391.51	1161.44	1183.09	1017.54	928.05		1367.94	316.507	119.628	1487.57	1248.31		1109.48	171.497	70.0134	1179.49	1039.46
12.1557	1901.52	1723.85	1334.62	1443.41	1110.48	1049.42	1011.71	1012.48	1334.43	1140.74	1189.58	1039.52	914.183		1367.86	344.681	130.277	1498.13	1237.58		1105.16	148.547	60.644	1165.8	1044.51
12.7082	1867.89	1673.75	1308.83	1493.54	1059.16	1027.18	999.278	1014.08	1242.73	1140.58	1191.54	1052.67	911.194		1347.09	343.287	129.75	1476.84	1217.34		1092.13	122.716	50.0986	1142.23	1042.03
13.2607	1796.47	1584.85	1312.28	1518.6	1028.41	1014.31	1004.03	994.756	1184.49	1126.77	1185.12	1037.66	920.739		1322.71	320.137	121	1443.71	1201.71		1074.92	108.097	44.1306	1119.05	1030.79
13.8133	1730.11	1506.94	1314.29	1537.22	1017.92	965.694	1010.06	979.744	1185.38	1093.48	1218.04	1055.78	933.256		1297.46	305.409	115.434	1412.9	1182.03		1077.61	111.785	45.636	1123.25	1031.98
14.3658	1682.74	1447.04	1254.97	1558.98	1000.02	885.317	994.494	960.906	1234.89	1093.19	1238.1	1113.02	910.083		1260.51	311.334	117.673	1378.18	1142.84		1091.7	136.003	55.5232	1147.22	1036.18
14.9183	1703.22	1419.73	1202.12	1606	966.867	848.989	993.2	939.983	1251.33	1139.19	1183.99	1125.22	900.356		1248.59	334.203	126.317	1374.91	1122.27		1090.01	139.279	56.8605	1146.87	1033.15
15.4708	1722.8	1421	1155.46	1648.02	938.517	839.761	984.106	923.339	1227.16	1160.21	1099.84	1099.12	919.556		1244.24	354.947	134.157	1378.4	1110.08		1071.54	125.461	51.2194	1122.76	1020.32
16.0234	1674.46	1403.56	1143.86	1632.48	913.772	838.922	963.239	903.783	1177.67	1159.72	1034.39	1072.67	930.817		1224.33	346.641	131.018	1355.34	1093.31		1046.51	113.672	46.4063	1092.91	1000.1
16.5759	1633.51	1399.23	1132.15	1552.86	887.556	833.2	922.3	869.833	1135.23	1137.47	1012.72	1060.71	939.444		1194.4	333.116	125.906	1320.31	1068.49		1025.9	107.348	43.8245	1069.73	982.076
17.1284	1641.48	1447.61	1162.44	1455.09	896.233	795.272	876.45	837.044	1114.53	1118.08	992.067	1079.56	971.956		1182.08	336.95	127.355	1309.44	1054.73		1018.87	108.313	44.2184	1063.09	974.656
17.681	1651.28	1512.31	1169.92	1382.45	904.683	755.383	859.878	808.844	1101.12	1114.98	954.744	1070.31	981.811		1176.56	349.313	132.028	1308.58	1044.53		1005.3	115.88	47.3079	1052.61	957.995
18.2335	1633.91	1558.34	1140.71	1323.38	883.128	740.783	848.928	801.3	1128.16	1148.05	914.417	1041.9	991.433		1161.31	355.782	134.473	1295.78	1026.84		1004.21	131.813	53.8123	1058.02	950.398
18.786	1603.17	1552.73	1102.18	1259.62	875.889	726.394	867.611	801.544	1189.87	1166.22	884.678	996.761	981.489		1141.09	345.357	130.533	1271.62	1010.55		1003.43	152.738	62.355	1065.78	941.071
19.3386	1509.37	1477.91	1082.61	1195.19	871.761	730.761	845.044	800.917	1238.53	1140.07	859.233	939.75	983.911		1101.81	309.077	116.82	1218.63	984.986		993.735	167.105	68.2201	1061.96	925.515
19.8911	1394.76	1374.07	1084.71	1181.26	874.689	718.05	808.894	799.211	1258.68	1092.62	829.667	915.283	1008.33		1062.35	270.895	102.389	1164.74	959.958		983.966	173.51	70.8353	1054.8	913.13
20.4436	1320.83	1285.52	1143.69	1200.84	899.006	692.078	788.039	791.994	1273.07	1053.81	797.789	912.817	1015.6		1047.14	251.603	95.0969	1142.24	952.047		974.18	181.914	74.2662	1048.45	899.914
20.9961	1287.84	1222.37	1229.47	1207.89	920.994	668.311	757.806	802.139	1283.52	1048.48	796.139	932.322	991.867		1042.1	255.175	96.4471	1138.54	945.65		975.745	181.416	74.0629	1049.81	901.682
21.5487	1272.38	1187.63	1254.7	1160.66	959.772	664.172	729.761	809.683	1245.19	1025.35	821.811	957.083	961.406		1032.72	251.664	95.12	1127.84	937.604		970.087	159.182	64.9858	1035.07	905.101
22.1012	1296.82	1174.9	1252.16	1106.48	979.761	669.972	717.733	806.672	1217.96	1029.93	847.267	957.767	940.606		1028.26	250.673	94.7457	1123.01	933.514		966.7	146.809	59.9343	1026.63	906.766
22.6537	1240.85	1182.46	1224.71	1042.35	943.683	674.083	724.733	806.517	1209.82	1033.13	880.972	959.228	935.572		1004.7	234.022	88.4521	1093.15	916.243		970.873	139.605	56.9934	1027.87	913.88
23.2063	1201.67	1185.77	1137.32	984.961	893.672	664.106	725.561	805.033	1186.09	1044.91	914.183	977.172	896.256		970.436	218.933	82.7489	1053.18	887.687		970.608	132.759	54.1988	1024.81	916.409
23.7588	1214.34	1165.86	1072.23	954.783	856.456	636.478	725.761	798.556	1164.29	1055.37	891.456	1007.53	863.211		946.559	219.349	82.9062	1029.47	863.653		963.403	136.492	55.7226	1019.13	907.68
24.3113	1255.34	1152.46	1072.23	942.206	823.761	619.433	725.511	796.7	1167.14	1060.91	830.522	1005.22	829.922		941.563	232.498	87.8761	1029.44	853.687		948.402	151.445	61.8272	1010.23	886.575
24.8639	1273.62	1155.92	1078.98	938.6	800.744	634.606	717.956	786.317	1170.62	1039.16	801.35	981.639	788.222		942.917	237.746	89.8595	1032.78	853.057		927.883	161.089	65.7642	993.648	862.119
25.4164	1262.1	1155.66	1066.78	918.667	792.061	663.606	704.439	783.761	1180.91	996.156	799.961	959.172	755.189		937.617	231.126	87.3575	1024.97	850.259		912.524	164.441	67.1327	979.657	845.391
25.9689	1285.3	1167.36	1036.25	885.622	773.856	684.55	700.394	795.372	1204.37	937.733	815.55	926.094	734.872		933.333	235.621	89.0562	1022.39	844.276		902.332	167.368	68.3277	970.66	834.004
26.5215	1330.21	1214.78	993.467	857.239	768.394	695.644	718.106	802.461	1244.19	882.5	838.3	888.483	726.878		939.691	250.29	94.6006	1034.29	845.091		897.135	180.082	73.5182	970.653	823.617
27.074	1363.14	1251.46	942.933	835.067	755.978	710.161	739.544	799.489	1270.84	861.311	843.528	887.322	731.378		942.611	262.645	99.2707	1041.88	843.34		898.979	190.211	77.6534	976.632	821.325
27.6265	1331.12	1271.52	890.094	819.867	739.961	696.917	733.178	789.472	1309.73	872.55	842.039	915.75	740.111		926.094	264.679	100.039	1026.13	826.055		911.608	204.553	83.5086	995.117	828.1
28.179	1245.9	1252.13	852.533	823.511	726.394	661.194	695.9	789.394	1320.71	902.017	837.406	937.983	749.811		893.937	251.764	95.1579	989.095	798.779		922.887	206.886	84.461	1007.35	838.426
28.7316	1180.62	1213.65	802.489	808.6	731.067	645.8	667.733	782.244	1268.58	955.389	835.872	913.328	738.017		864.279	235.64	89.0635	953.343	775.216		915.572	190.715	77.8592	993.431	837.713
29.2841	1122.12	1180.64	771.4	775.006	734.989	636.517	636.417	763.711	1171.26	1028.98	827.311	861.361	708.372		836.727	222.996	84.2844	921.012	752.443		893.498	174.376	71.1885	964.687	822.31
29.8366	1106.11	1143.41	768.861	738.844	719.706	620.772	608.683	739.767	1104.82	1053.89	803.672	818.828	687.5		815.198	219.809	83.0801	898.278	732.117		868.08	171.008	69.8139	937.894	798.266
30.3892	1088.76	1109.22	766.661	714.622	716.533	627.556	584.411	736.722	1102.77	1003.63	774.406	795.728	683.717		801.108	212.356	80.2629	881.371	720.845		849.495	165.308	67.4865	916.981	782.008
30.9417	1031.07	1089.91	766.983	705.411	704.361	623.439	572.361	743.761	1080.93	944.617	743.4	770.333	698.456		784.79	199.164	75.2769	860.067	709.514		830.249	149.601	61.0743	891.324	769.175
31.4942	969.583	1061.41	743.033	705	706.389	612.917	578.028	738.061	1064.49	900.572	727.372	769.267	711.094		768.051	180.394	68.1824	836.233	699.868		818.477	138.552	56.5637	875.04	761.913
32.0468	954.072	1029.21	697.456	693.994	727.733	613.861	590.422	734.528	1032.67	850.917	723.817	791.067	703.294		758.107	168.095	63.5341	821.641	694.573		806.049	123.314	50.3427	856.392	755.706
32.5993	930.633	985.222	673.828	694.194	737.15	616.828	593.35	735.806	1032.08	807.133	747.2	816.811	693.606		747.315	152.35	57.5828	804.898	689.732		805.439	120.204	49.0729	854.512	756.366
33.1518	899.9	934.256	662.694	712.989	734.733	620.95	591.917	742.072	1050.87	778.178	769.661	811.45	694.656		736.777	132.957	50.2531	787.03	686.524		807.814	125.338	51.1692	858.983	756.645
33.7043	848.006	933.956	675.389	746.089	726.622	623.6	602.794	755.017	1077.07	761.922	769.872	751.061	714.478		736.637	119.701	45.2428	781.879	691.394		804.904	134.696	54.9893	859.893	749.914
34.2569	832.789	930.611	697.839	754.622	719.372	629.256	598.978	734.183	1098.74	748.5	764.017	688.083	744.311		737.638	115.088	43.4992	781.137	694.139		796.306	150.379	61.3918	857.697	734.914
34.8094	833.522	914.228	691.656	745.722	711.328	623.083	576.844	690	1099.22	738.283	763.683	652.806	753.367		728.055	116.608	44.0736	772.128	683.981		782.893	160.526	65.5346	848.427	717.358
35.3619	812.756	902.178	698.961	708.711	717.422	609.739	556.583	655.922	1081.02	737.594	742.544	638.628	731.811		715.193	116.24	43.9345	759.127	671.258		764.586	161.301	65.851	830.437	698.735
35.9145	789.122	906.056	697.194	664.739	723.661	602.728	544.933	635.578	1077.21	749.778	713.233	639.956	699.933		704.062	119.447	45.1466	749.208	658.915		752.615	164.977	67.3515	819.966	685.263
36.467	784.439	918.383	688.95	631.267	708.089	610.222	538.378	616.828	1109.97	761.283	696.322	667.311	684.589		697.104	125.071	47.2722	744.376	649.832		756.05	179.564	73.3067	829.357	682.743
37.0195	793.972	936.256	672.361	618.111	698.067	623.261	525.267	611.444	1154.1	770.761	709.278	711.15	666.55		695.328	134.405	50.8004	746.128	644.527		770.547	195.205	79.6919	850.239	690.855
37.5721	810.744	954.461	677.689	630.706	689.811	615.828	515.633	603.006	1163.78	802.672	746.856	737.611	656.028		699.267	143.463	54.224	753.491	645.043		784.992	198.616	81.0846	866.076	703.907
38.1246	789.783	962.011	685.828	649.789	727.411	612.389	494.528	587.128	1157.36	802.983	783.461	759.956	645.289		703.106	147.202	55.6372	758.743	647.468		789.363	199.08	81.274	870.637	708.089
38.6771	777.644	957.828	682.967	658.411	779.094	616.628	479.139	579.594	1135.97	793.394	783.561	754.494	628.661		707.387	150.625	56.931	764.318	650.456		779.279	195.253	79.7116	858.99	699.567
39.2296	761.644	960.317	693.067	653.022	791.956	605.922	473.161	567.411	1110.36	790.706	748.167	735.367	619.733		705.584	154.037	58.2205	763.805	647.364		761.957	190.36	77.7142	839.672	684.243
39.7822	738.922	975.561	695.367	660.694	763.289	585.45	467.828	567.339	1075.42	796.283	731.022	724.633	626.906		698.159	158.126	59.7659	757.925	638.393		753.6	177.472	72.4526	826.053	681.147
40.3347	698.833	964.45	675.028	654.45	755.117	569.794	467.644	577.083	1034.79	796.694	710.172	713.294	636.622		683.617	155.314	58.7033	742.32	624.913		744.776	160.507	65.5268	810.303	679.25
40.8872	659.217	924.317	641.617	615.439	760.2	567.911	470.511	591.111	992.439	807.406	694.889	701.889	653.461		662.745	145.236	54.8942	717.639	607.85		740.199	142.417	58.1415	798.341	682.058
41.4398	647.922	892.039	601.7	585.472	755.578	584.483	470.489	597.228	959.7	837.206	681.022	674.244	663.283		648.24	137.068	51.8068	700.047	596.434		735.447	135.399	55.2764	790.724	680.171
41.9923	643.261	864.35	579.378	578.578	754.361	608.194	459.361	591.994	948.633	825.139	667.8	643.083	658.789		641.069	131.975	49.8817	690.951	591.187		722.573	135.692	55.3958	777.969	667.177
42.5448	642.939	842.089	578.583	581.389	734.494	613.533	447.817	580.928	943.35	835.083	646.517	624.3	645.733		634.406	125.433	47.4093	681.816	586.997		712.652	142.983	58.3724	771.024	654.279
43.0974	649.239	834.906	582.128	587.572	714.128	604.961	444.161	573.828	926.928	830.961	626.078	620.383	644.567		631.014	121.574	45.9508	676.964	585.063		703.791	140.966	57.5489	761.34	646.242
43.6499	650.361	837.456	591.117	587.9	694.656	599.833	439.472	581.65	906.594	820.889	608.95	627.472	649.339		628.685	121.186	45.804	674.489	582.881		699.149	132.223	53.9798	753.129	645.169
44.2024	626.744	834.733	609.333	582.417	700.194	592.511	431.239	586.072	904.767	823.394	603.761	618.978	660.478		625.31	122.68	46.3686	671.679	578.942		699.575	132.305	54.0131	753.588	645.562
44.7549	607.45	824.094	619.689	573.583	695.556	594.311	425.872	572.956	959.806	812.494	594.267	608.339	686.822		620.079	121.12	45.7792	665.858	574.3		705.781	152.216	62.1419	767.923	643.639
45.3075	624.333	822.25	606.128	566.106	694.283	602.244	425.267	555.422	1002.98	796.906	589.811	611.789	726.389		620.087	120.951	45.7152	665.802	574.372		713.883	168.259	68.6913	782.575	645.192
45.86	641.622	823.35	561.694	560.389	682.6	595.911	425.667	550.328	986.544	775.883	601.844	610.133	718.933		613.033	122.947	46.4698	659.503	566.564		707.278	160.012	65.3245	772.602	641.953
46.4125	625.956	841.15	545.494	577.65	679.689	581.5	431.033	553.483	936.85	767.689	618.456	607	670.722		611.782	126.865	47.9504	659.732	563.831		692.367	139.966	57.141	749.508	635.226
46.9651	609.789	856.822	544.561	594.517	687.533	564.956	439.089	568.544	889.2	763.811	634.294	598.844	641.289		613.895	130.759	49.4223	663.318	564.473		682.664	121.114	49.4445	732.108	633.219
47.5176	630.389	865.761	541.056	586.994	686.9	548.644	450.189	580.017	872.233	757.933	625.606	602.8	632.667		615.705	132.98	50.2617	665.966	565.443		678.543	113.287	46.2493	724.792	632.293
48.0701	668.289	861.817	539.461	565.739	708.994	537.644	461.578	593.572	872.083	743.817	618.144	593.761	616.061		620.503	135.423	51.1851	671.688	569.318		672.906	112.684	46.0029	718.909	626.903
48.6227	678.828	860.006	530.139	545.394	735.178	539.428	471.472	611.961	862.45	743.339	616.756	586.35	610.556		622.921	139.322	52.6587	675.579	570.262		671.902	108.746	44.3953	716.297	627.507
49.1752	668.328	867.339	528.561	537.272	691.394	533.811	475.806	608.028	839.456	738.8	614.022	587.139	623.389		614.644	136.525	51.6015	666.246	563.043		668.472	99.4458	40.5986	709.071	627.874
49.7277	654.878	892.872	534.378	522.733	637.039	529.006	478.983	601.5	831.85	713.85	607.667	606.283	640.083		607.127	141.282	53.3996	660.527	553.727		666.872	91.2054	37.2344	704.107	629.638
50.2803	639.167	933.228	552.461	504.3	626.989	530.15	485.028	593.3	822.4	703.517	604.706	641.1	658.811		610.189	153.89	58.1649	668.354	552.024		670.639	84.2061	34.377	705.016	636.262
50.8328	648.017	972.606	557.528	493.644	631.239	525.161	475.35	588.978	798.556	692.6	596.2	656.956	670.228		614.792	170.704	64.52	679.312	550.272		667.253	76.385	31.184	698.437	636.069
51.3853	659.417	1000.56	544.5	490.361	643.778	512.889	468.872	592.628	774.039	685.244	584.211	659.5	679.567		617.197	184.26	69.6436	686.84	547.553		662.532	69.6703	28.4428	690.974	634.089
51.9378	652.022	991.294	534.056	505.278	654.811	505.389	464.556	607.644	766.994	689.583	563.967	660.678	672.311		615.344	181.563	68.6244	683.968	546.719		660.196	69.9116	28.5413	688.737	631.655
52.4904	617.989	969.939	509.556	518.178	667.033	496.2	462.633	615.039	794.761	689.494	548.444	658.244	649.406		605.933	176.042	66.5376	672.47	539.395		659.231	81.9859	33.4706	692.702	625.761
53.0429	579.283	935.572	509.961	546.994	685.011	494.678	467.75	614.194	818.233	677.428	537.417	658.683	640.889		602.75	163.152	61.6656	664.415	541.084		657.807	92.5249	37.7731	695.58	620.034
53.5954	562.939	875.05	503.661	602.261	678.911	499.511	472.733	618.839	821.422	674.367	541.617	658.65	643.528		599.295	140.731	53.1912	652.486	546.104		659.737	91.9184	37.5255	697.263	622.212
54.148	571.111	836.494	488.067	631.906	666.189	508.706	478.339	631.833	836.533	675.939	561.389	641.028	651.106		597.259	127.655	48.2492	645.508	549.01		666.305	91.7998	37.4771	703.782	628.828
54.7005	605.989	830.083	475.911	628.239	668.617	508.75	470.456	640.372	821.689	690.233	578.122	621.211	660		598.292	128.43	48.542	646.834	549.75		668.604	83.913	34.2574	702.862	634.347
55.253	665.183	831.517	480.644	637.017	675.45	498.8	466.706	638.361	807.294	705.133	591.711	599.956	665.717		607.902	133.373	50.4101	658.312	557.492		668.029	80.1441	32.7187	700.747	635.31
55.8055	681.861	829.222	475.133	651.672	663.633	502.178	463.556	631.139	824.361	715.094	587.511	580.483	668.25		609.608	134.842	50.9656	660.573	558.642		667.806	91.8291	37.4891	705.295	630.317
56.3581	640.456	823.15	469.333	669.739	648.644	506.939	464.267	649.328	831.3	731.711	588.806	573.639	660.339		603.218	130.861	49.4608	652.679	553.757		672.52	96.1108	39.2371	711.758	633.283
56.9106	595.694	829.372	466.572	681.956	646.6	521.117	443.028	677.35	817.444	747.933	595.5	578.006	663.689		597.763	135.492	51.2113	648.974	546.551		679.987	90.9086	37.1133	717.1	642.874
57.4631	576.483	842.222	457.25	706.589	638.222	524.139	431.144	689.578	793.7	738.55	580.933	572.572	669.406		596.578	145.264	54.9046	651.483	541.674		674.123	86.8419	35.4531	709.576	638.67
58.0157	563.139	862.561	458.683	735.444	642.183	493.311	445.411	680.822	769.939	703.822	543.828	549.317	675.422		600.105	155.816	58.893	658.998	541.212		653.858	89.6646	36.6054	690.464	617.253
58.5682	565.972	879.572	464.772	758.494	670.406	459.311	461.15	676.972	769.178	678.539	527.55	527.717	683.383		608.525	166.456	62.9146	671.44	545.611		643.89	96.5224	39.4051	683.295	604.485
59.1207	595.106	886.061	462.983	733.722	694.994	449.228	451.939	678.089	775.344	652.122	525.628	517.483	682.233		610.576	169.019	63.8833	674.459	546.693		638.483	99.7767	40.7336	679.217	597.75
59.6733	606.1	897.961	463.922	684.3	684.65	442.511	427.661	664.128	774.6	612.644	530.017	519.006	658.633		601.015	171.32	64.7529	665.768	536.262		626.505	95.3288	38.9178	665.422	587.587
60.2258	585.767	905.183	472.239	639.567	653.411	439.506	412.528	650.228	775.4	606.856	540.233	533.722	633.789		586.886	170.186	64.3244	651.21	522.561		623.371	88.5034	36.1314	659.503	587.24
60.7783	577.561	906.989	469.494	611.55	638.028	439.639	406.211	643.428	772.022	610.728	540.794	552.144	632.311		578.496	169.995	64.2521	642.748	514.244		625.238	83.1992	33.9659	659.204	591.272
61.3309	586.694	868.306	471.378	596.467	620.078	445.389	404.206	633.239	760.272	606.067	539.611	555.389	633.739		570.36	155.571	58.8004	629.16	511.559		621.386	78.5619	32.0727	653.459	589.313
61.8834	636.228	830.356	467.567	592.856	606.111	453.878	411.206	628.3	743.378	587.283	540.317	553.183	652.811		571.172	143.283	54.156	625.328	517.016		617.545	75.1209	30.668	648.213	586.877
62.4359	666.994	814.828	455.078	593.178	594.3	478.156	430.372	610.906	742.956	580.956	537.172	549.128	667.578		576.129	136.23	51.4901	627.62	524.639		614.783	78.3696	31.9943	646.777	582.788
62.9884	641.739	811.139	438.622	585.433	589.217	493.094	435.311	606.844	752.1	565.378	551.706	546.467	661.278		570.651	132.423	50.0511	620.702	520.6		613.962	80.2039	32.7431	646.705	581.219
63.541	607.861	795.589	437.1	576.05	596.833	491.889	421.939	607.522	754.939	561.017	573.367	549.311	649.367		561.037	127.935	48.3548	609.392	512.682		615.921	77.1717	31.5052	647.426	584.415
64.0935	593.222	779.117	430.028	573.789	574.833	470.194	409.039	601	765.594	568.189	596.65	557.667	642.333		547.175	126.571	47.8394	595.014	499.335		621.905	76.3552	31.1719	653.077	590.734
64.646	572.739	770.061	427.667	572.522	531.911	458.217	405.367	579.794	772.233	584.906	640.133	559.856	634.461		534.069	124.036	46.8813	580.95	487.188		628.564	77.2201	31.525	660.089	597.039
65.1986	562.456	752.644	428.094	555.194	514.689	457.45	408.828	568.622	785.783	598.05	671.783	548.244	635.389		525.622	116.683	44.1021	569.724	481.52		634.645	86.4706	35.3015	669.947	599.344
65.7511	550.717	746.578	421.922	528.311	515.322	463.256	405.239	569.728	809.1	593.339	665.922	529.094	655.967		518.764	114.288	43.1968	561.96	475.567		637.192	98.8837	40.3691	677.561	596.823
66.3036	539.683	736.544	430.572	513.011	539.756	474.944	394.378	567.961	836.606	575.961	641.906	524.406	674.889		518.413	110.686	41.8354	560.248	476.577		636.955	111.778	45.6332	682.588	591.322
66.8562	532.744	714.211	450.833	514.706	566.406	482.711	387.811	547.539	863.7	563.572	622.172	537.917	716.644		521.346	103.035	38.9437	560.29	482.402		641.924	127.297	51.9688	693.893	589.955
67.4087	539.983	693.272	452.561	514.667	587.944	473.906	384.322	529.978	864.561	554.544	613.667	574.406	732.878		520.951	100.118	37.8412	558.792	483.11		645.006	129.079	52.6964	697.702	592.309
67.9612	553.394	692.794	460.967	510.656	588.244	457.922	378.578	512.55	847.544	558.728	629.061	615.778	716.933		520.365	102.514	38.7468	559.112	481.618		646.766	120.228	49.0828	695.848	597.683
68.5137	567.678	694.072	446.783	503	572.761	443.511	374.222	503.65	824.422	571.011	634.739	642.583	678.906		514.575	106.383	40.2088	554.784	474.366		642.552	108.509	44.2987	686.851	598.253
69.0663	579.656	668.739	449.622	505.039	539.678	425.267	377.328	500.411	808.428	565.789	622.661	650.789	640.944		506.476	99.4112	37.5739	544.049	468.902		631.504	103.291	42.1684	673.672	589.335
69.6188	586.917	646.572	439.222	513.072	512.6	424.344	382.372	503.811	812.078	554.439	598.239	638.911	648.294		500.728	93.6465	35.395	536.123	465.333		625.962	105.934	43.2476	669.21	582.714
70.1713	576.011	642.433	436.761	519.489	476.611	423.722	397.617	511.183	798.756	551.039	588.656	626.067	661.1		496.092	88.6797	33.5178	529.61	462.574		622.8	101.205	41.3166	664.117	581.484
70.7239	556.706	641.967	434.239	529.706	462.522	417.344	402.556	511.628	776.85	559.433	585.206	629.578	664.106		492.149	87.4429	33.0503	525.199	459.098		621.134	93.0105	37.9714	659.105	583.162
71.2764	537.011	643.55	429.689	543.844	483.972	400.656	395.061	516.511	766.911	561.817	567.667	643.578	660.156		490.54	90.6957	34.2798	524.82	456.261		619.44	90.0926	36.7801	656.22	582.66
71.8289	542.378	656.117	417.717	552.961	485.167	391.094	380.767	529.578	755.406	553.839	556.9	665.911	652.856		489.457	101.047	38.1921	527.649	451.265		619.082	87.2377	35.6146	654.696	583.467
72.3815	562.811	678.778	422.95	561.556	467.072	395.106	371.478	549.267	740.089	522.694	562.85	669.572	652.311		494.25	111.06	41.9768	536.227	452.273		616.131	84.3453	34.4338	650.564	581.697
72.934	582.017	698.117	428.411	568.622	459.689	398.45	366.561	566.694	702.539	498.883	573.961	632.7	652.911		500.267	119.411	45.1331	545.4	455.134		604.615	72.4808	29.5901	634.205	575.025
73.4865	569.267	698.139	445.933	555.283	468.583	396.85	366.172	570.378	667.667	485.922	581.417	607.789	653.306		500.032	115.162	43.527	543.559	456.505		594.413	65.6206	26.7895	621.203	567.624
74.039	541.55	678.339	455.483	539.039	490.456	393.989	370.45	564.239	639.256	482.1	575.106	593.767	645.678		495.615	104.095	39.3443	534.959	456.271		583.358	59.6717	24.3608	607.719	558.997
74.5916	533.511	663.639	457.95	520.894	502.633	387.989	375.211	555.028	634.528	489.3	564.372	567.456	607.794		491.69	98.1051	37.0803	528.77	454.609		569.746	49.7326	20.3033	590.05	549.443
75.1441	535.811	653.689	460.917	521.983	500.656	383.183	371.022	537.872	643.572	504.767	561.139	541.867	566.133		489.609	96.9876	36.6579	526.267	452.951		559.225	46.6663	19.0514	578.276	540.174
75.6966	528.8	657.772	462.867	529.622	501.25	384.917	368.317	533.256	667.628	509.467	569.083	532.706	540.311		490.506	98.2624	37.1397	527.646	453.367		558.742	56.6714	23.136	581.878	535.606
76.2492	516.483	662.439	464.6	529.756	496.039	387.1	368.5	548.906	695.161	516.333	578.406	540.539	533.172		489.274	98.3579	37.1758	526.45	452.098		568.753	65.2318	26.6308	595.384	542.122
76.8017	513.333	676.372	441.294	525.622	489.539	398.011	372.494	573.022	694.517	520.128	593.383	546.528	537.044		488.095	100.966	38.1615	526.256	449.934		577.437	63.0123	25.7247	603.162	551.712
77.3542	517.828	712.306	422.133	524.817	495.739	412.3	364.133	594.706	680.356	543.006	620.144	549.806	533.806		492.751	113.924	43.0593	535.81	449.692		586.971	56.6069	23.1097	610.08	563.861
77.9068	540.183	733.733	414.772	530.211	509.517	410.783	356.811	610.889	678.028	574.222	665.411	538.906	526.35		499.43	124.481	47.0495	546.479	452.381		598.968	63.7188	26.0131	624.981	572.955
78.4593	553.144	720.494	410.061	525.478	509.156	399.133	353.444	608.389	686.061	581.228	677.056	539.172	518.372		495.844	123.69	46.7506	542.595	449.094		601.713	69.4442	28.3505	630.063	573.363
79.0118	545.089	685.117	412.844	520.539	490.928	390.089	352.994	594.861	681.661	574.75	665.639	564.083	513.894		485.371	112.986	42.7047	528.076	442.667		599.148	63.7823	26.039	625.187	573.109
79.5644	549.272	640.561	421.933	512.65	492.8	388.856	353.206	578.467	687.928	577.678	652.806	605.383	517.561		479.897	99.636	37.6589	517.556	442.238		603.304	60.401	24.6586	627.962	578.645
80.1169	559.739	608.539	422.422	495.311	505.683	392.983	348.817	561.089	714.922	582.294	618.083	630.517	530.139		476.213	92.8892	35.1088	511.322	441.105		606.174	64.7221	26.4227	632.597	579.751
80.6694	565.961	586.006	435.178	472.683	510.017	399.739	353.289	553.744	751.806	594.922	597.411	618.711	546.717		474.696	85.5285	32.3267	507.023	442.369		610.552	74.4826	30.4074	640.959	580.144
81.2219	536.044	570.828	429.506	440.75	489.289	406.033	365.317	539.667	768.5	616.878	577.739	579.333	554.722		462.538	73.0936	27.6268	490.165	434.911		606.14	83.7422	34.1876	640.327	571.952
81.7745	514.611	557.389	424.356	415.717	469.95	415.356	379.794	515.739	777.022	634.089	554.867	574.583	564.728		453.882	63.1948	23.8854	477.767	429.996		603.505	93.2225	38.0579	641.563	565.447
82.327	512.372	552.383	417.922	403.517	465.917	426.872	386.567	497.294	782.05	644.928	542.1	595.422	577.722		452.221	61.0187	23.0629	475.284	429.159		606.586	99.3163	40.5457	647.132	566.04
82.8795	509.783	558.444	414.606	396.35	476.522	440.767	381.561	480.283	746.294	650.206	537.489	597.644	591.756		454.005	64.324	24.3122	478.317	429.693		600.612	91.9061	37.5205	638.132	563.092
83.4321	503.261	567.961	408.289	396.817	495.983	440.567	375.633	464.911	718.856	652.817	560.256	578.233	613.233		455.502	69.3323	26.2051	481.707	429.296		598.051	86.4536	35.2945	633.346	562.756
83.9846	507.106	566.172	401.861	400.056	518.028	433.322	366.444	459	720.678	665.967	586.189	560.533	615.589		456.141	74.3778	28.1122	484.253	428.029		601.326	90.3069	36.8676	638.194	564.458
84.5371	504.889	560.244	401.094	410.311	514.633	407.906	357.028	459.083	747.906	675.056	596.606	552.789	606.056		450.872	74.9682	28.3353	479.207	422.537		606.249	99.4082	40.5832	646.833	565.666
85.0897	495	565.172	410.561	428.511	474.411	376.711	350.939	459.972	746.928	646.983	594.411	559.433	597.439		443.044	73.8786	27.9235	470.967	415.12		600.861	94.9548	38.7652	639.626	562.096
85.6422	493.128	577.172	425.744	447.044	440.75	355.089	355.189	460.256	740.933	621.533	582.683	576.561	593.006		442.017	77.7458	29.3852	471.402	412.631		595.829	90.1642	36.8094	632.638	559.019
86.1947	502.817	594.078	443.8	452.178	430.4	345.061	364.667	453.328	740.978	617.533	552.472	579.367	605.35		447.572	83.8929	31.7085	479.28	415.863		591.505	93.7818	38.2862	629.791	553.218
86.7472	514.011	627.556	456.444	454.328	430.217	338.467	365.533	451.633	744.189	605.589	527.689	573.956	609.2		455.222	96.141	36.3379	491.56	418.884		585.376	97.5122	39.8092	625.185	545.567
87.2998	539.222	650.578	460.389	458.033	432.511	332.839	360.6	466.172	746.044	585.15	520.339	574.861	607.422		462.025	107.531	40.6429	502.667	421.382		583.331	94.6839	38.6545	621.986	544.677
87.8523	545.6	654.022	465.939	455.672	438.217	331.072	348.211	480.589	743.361	561.789	530.3	579.411	617.244		462.676	111.482	42.1363	504.812	420.54		585.449	90.0893	36.7788	622.228	548.67
88.4048	541.372	618.983	477.906	452.094	452.3	329.494	338.917	490.978	717.194	558.156	542.856	580.744	625.367		458.724	103.296	39.0424	497.766	419.681		585.883	78.0449	31.8617	617.744	554.021
88.9574	522.511	579.822	480.9	448.011	449.894	321.956	336.478	496.483	695.522	578.65	572.422	565.606	623.544		448.51	93.3964	35.3005	483.811	413.21		588.704	66.3752	27.0976	615.802	561.607
89.5099	497.911	551.356	478.533	438.922	448.467	320.806	339.994	510.778	696.606	604.856	588.95	557.517	642.178		439.427	83.1841	31.4406	470.868	407.986		600.148	64.8423	26.4718	626.619	573.676
90.0624	476.856	535.456	483.556	438.261	453.572	323.056	342.822	528.467	707.356	609.122	558.272	561.9	654.872		436.226	77.0003	29.1034	465.329	407.122		603.331	67.6205	27.606	630.937	575.726
90.615	474.172	521.944	483.067	454.722	477.233	329.744	344.472	532.339	728.578	600.317	514.794	562.561	649.722		440.765	73.7318	27.868	468.633	412.897		598.052	80.2766	32.7728	630.825	565.279
91.1675	475.622	502.744	490.217	479.278	511.272	336.422	342.411	525.489	733.839	595.639	498.006	581.311	652.539		448.281	75.4121	28.5031	476.784	419.778		597.804	85.9852	35.1033	632.907	562.701
91.72	462.844	491.278	482.478	493.983	537.106	343.761	338.922	517.844	716.772	586.878	505.622	601.35	649.467		450.053	77.5356	29.3057	479.359	420.747		596.322	79.7902	32.5742	628.896	563.748
92.2725	453.106	490.567	466.328	489.233	537.111	349.8	331.022	516.567	723.078	577.961	510.333	602.472	631.106		445.31	76.4758	28.9051	474.215	416.404		593.586	79.1985	32.3327	625.919	561.254
92.8251	467.217	490.461	443.917	472.444	500.544	348.45	326.789	530.522	719.111	581.45	514.45	584.922	588.367		435.689	69.6283	26.317	462.006	409.372		586.47	72.0304	29.4063	615.877	557.064
93.3776	480.467	502.733	426.367	456.172	499.128	340.167	327.817	534.65	708.172	606.728	551.106	576.1	552.883		433.264	72.7445	27.4948	460.759	405.77		588.273	63.8339	26.0601	614.333	562.213
93.9301	482.967	501.417	419.844	438.067	516	333.65	328.961	534.2	695.517	629.417	579.75	589.8	551.433		431.558	76.3166	28.845	460.403	402.713		596.686	58.5243	23.8924	620.579	572.794
94.4827	484.972	494.006	419.039	419.244	520.661	325.944	325.267	530.728	679.267	625.806	572.15	604.294	577.456		427.019	78.8547	29.8043	456.823	397.215		598.284	51.0538	20.8426	619.126	577.441
95.0352	471.122	513.622	422.872	401.439	509.178	322.522	317.3	521.956	666.361	625.144	538.539	607.35	611.028		422.579	81.3293	30.7396	453.319	391.84		595.063	54.6511	22.3112	617.374	572.752
95.5877	455.306	560.833	419.561	392.094	486.611	319.15	307.622	517.794	643.861	633.372	507.772	596.972	639.189		420.168	90.4579	34.1899	454.358	385.978		589.827	62.0085	25.3149	615.142	564.512
96.1403	449.989	610.7	421.25	392.178	464.422	316.094	305.067	512.239	634.539	629.178	498.178	584.744	665.978		422.814	103.252	39.0254	461.84	383.789		587.476	68.9329	28.1418	615.618	559.334
96.6928	440.778	639.422	421.867	388.767	454.367	314.883	302.911	507.022	613.517	594.533	495.367	570.778	642.061		423.285	112.117	42.3763	465.661	380.909		570.546	58.6916	23.9607	594.507	546.586
97.2453	436.167	604.772	438.6	387.372	467.028	314.05	303.589	508.844	595.328	562.039	489.367	554.717	599.728		421.654	102.292	38.6628	460.317	382.991		551.671	44.8288	18.3013	569.972	533.369
97.7978	437.106	545.45	467.994	390.844	474.978	310.833	309.661	512.3	591.744	549.306	482.156	533.528	554.944		419.552	87.8418	33.2011	452.753	386.351		537.33	37.6821	15.3836	552.713	521.946
98.3504	442.3	521.95	473.928	401.478	477.15	308.011	313.178	509.533	604.261	548.706	475.267	523.839	525.528		419.714	83.0265	31.3811	451.095	388.332		531.189	43.1942	17.6339	548.823	513.555
98.9029	448.456	535.589	454.461	411.272	486.422	300.617	314.817	510.283	617.433	560.144	468.444	518.15	514.411		421.662	86.7397	32.7845	454.447	388.877		531.478	51.1887	20.8977	552.375	510.58
50-100	545.101	692.21	452.316	516.454	537.391	413.079	383.98	556.862	741.397	603.264	568.869	582.906	623.375
0-50	1301.94	1312.05	1020.69	1027.38	999.487	776.544	787.036	820.349	1187.79	984.906	958.044	937.893	881.685
whole ROI	927.725	1005.57	739.659	774.755	771.006	596.831	587.747	690.07	967.071	796.205	765.618	762.372	753.965

## Sheet: Figure 7H
Figure 7H: NESTIN fluorescence intensity lateral to the IHF 0-100 micron from the IHF base
Distance (microns)	C57 NESTIN IF n1	C57 NESTIN IF n2	C57 NESTIN IF n3	C57 NESTIN IF n4	C57 NESTIN IF n5	C57 NESTIN IF n6	C57 NESTIN IF n7	BTBR NESTIN IF n1	BTBR NESTIN IF n2	BTBR NESTIN IF n3	BTBR NESTIN IF n4	BTBR NESTIN IF n5	BTBR NESTIN IF n6		C57Bl/6 mean	C57Bl/6 Std.s	C57Bl/6 SEM	C57Bl/6 mean + SEM	C57Bl/6 mean - SEM		BTBR mean	BTBR Std s	BTBR SEM	BTBR mean + SEM	BTBR mean - SEM
0	1113.72	1445.94	1450.32	1177.54	1062.82	1083.16	907.456	972.756	1766.28	1308.87	1472.51	1525.46	1446.45		1177.28	202.295	76.4602	1253.74	1100.82		1415.39	263.34	107.508	1522.9	1307.88
0.5525	1262.17	1426.33	1613.22	1165.08	1120.9	1088.26	917.661	1036.59	1833.97	1372.81	1523.14	1582.28	1436.41		1227.66	230.999	87.3094	1314.97	1140.35		1464.2	263.106	107.413	1571.61	1356.79
1.1051	1443.89	1438.88	1711.04	1174.72	1234.17	1082.48	917.617	1137.67	1827.62	1449.16	1600.57	1484.47	1411.14		1286.11	264.939	100.138	1386.25	1185.98		1485.1	227.209	92.7578	1577.86	1392.35
1.6576	1566.92	1401.2	1718.65	1215.95	1379.04	1076.36	924.033	1266.33	1871.99	1529.47	1678.35	1354.61	1415.48		1326.02	275.891	104.277	1430.3	1221.74		1519.37	224.359	91.5943	1610.97	1427.78
2.2101	1624.09	1308.04	1659.46	1254.64	1468.68	1074.75	919.172	1400.42	1999.68	1576.18	1755.34	1318.22	1412.93		1329.83	275.184	104.01	1433.84	1225.82		1577.13	259.047	105.756	1682.88	1471.37
2.7627	1730.04	1250.43	1632.19	1282.96	1476.29	1050.01	890.583	1475.97	2081.28	1588.64	1836.43	1360.28	1391.66		1330.36	303.529	114.723	1445.08	1215.63		1622.38	283.163	115.601	1737.98	1506.78
3.3152	1812.13	1234.16	1651.41	1321.86	1444.8	1049.29	860.606	1452.95	2034.36	1588.17	1868.76	1444.31	1395.88		1339.18	330.838	125.045	1464.22	1214.13		1630.74	261.876	106.91	1737.65	1523.83
3.8677	1886.71	1254.62	1673.38	1385.32	1474.82	1058.13	851.856	1384.21	1925.68	1583.76	1882.72	1515.42	1420.18		1369.26	353.387	133.568	1502.83	1235.69		1618.66	232.478	94.9089	1713.57	1523.75
4.4202	1933.18	1279.18	1633.06	1428.73	1455.4	1080.46	870.139	1319.01	1825.12	1562.08	1882.52	1557.62	1409.96		1382.88	350.688	132.547	1515.43	1250.33		1592.72	222.929	91.0102	1683.73	1501.71
4.9728	1947.38	1288.49	1582.18	1433.99	1465.5	1092.62	895.739	1264	1775.99	1526.33	1937.25	1587.01	1364.29		1386.56	341.124	128.933	1515.49	1257.63		1575.81	251.098	102.51	1678.32	1473.3
5.5253	1979.85	1292.56	1616.08	1388.86	1431.24	1074.44	916.406	1230.52	1756.36	1472.31	1974.65	1593.03	1334.57		1385.63	349.755	132.195	1517.83	1253.44		1560.24	275.19	112.346	1672.59	1447.89
6.0778	1991.46	1284.8	1711.39	1303.17	1423.46	1077.02	931.85	1216.13	1721.58	1399.29	1913.82	1589.94	1325.01		1389.02	363.459	137.375	1526.4	1251.65		1527.63	262.755	107.269	1634.9	1420.36
6.6304	1950.52	1272.61	1752.64	1205.83	1467.82	1117.2	964.433	1222.08	1676.64	1332.28	1775.27	1634.86	1324.24		1390.15	354.725	134.073	1524.22	1256.08		1494.23	228.571	93.3136	1587.54	1400.91
7.1829	1882.53	1247.34	1746.17	1115.02	1489.93	1144.26	987.539	1218.84	1688.39	1315.09	1664.18	1681.49	1341.04		1373.26	340.539	128.712	1501.97	1244.54		1484.84	215.646	88.0371	1572.88	1396.8
7.7354	1838	1229.29	1691.01	1068.63	1502.85	1141.29	992.583	1199.39	1705.92	1330.82	1601.64	1686.95	1310.03		1351.95	327.316	123.714	1475.66	1228.24		1472.46	218.27	89.1082	1561.57	1383.35
8.288	1836.01	1232.59	1570.24	1067.21	1476.51	1127.04	967.522	1164.03	1677.34	1337.08	1612.01	1676.57	1220.41		1325.3	312.57	118.14	1443.44	1207.16		1447.91	235.15	95.9994	1543.91	1351.91
8.8405	1790.93	1272.15	1518.03	1096.44	1444.9	1116.92	965.967	1145.76	1667.27	1335.58	1632.22	1648	1181.91		1315.05	287.307	108.592	1423.64	1206.46		1435.12	243.232	99.2989	1534.42	1335.82
9.393	1811.01	1305.92	1508.15	1138.47	1418.77	1125.48	989.55	1131.26	1675.57	1359.29	1636.26	1585.81	1164.19		1328.19	278.676	105.33	1433.52	1222.86		1425.4	241.619	98.6404	1524.04	1326.76
9.9455	1861.37	1301.89	1508.46	1184.01	1401.54	1154.73	1013.82	1138.44	1667.46	1343.36	1651.87	1534.87	1155.78		1346.55	279.939	105.807	1452.35	1240.74		1415.3	237.916	97.1288	1512.43	1318.17
10.4981	1850.16	1272.37	1519.99	1244.38	1431.03	1183.06	1035.81	1148.62	1623.25	1308.32	1646.58	1539.89	1155.75		1362.4	267.181	100.985	1463.38	1261.41		1403.73	228.64	93.3419	1497.08	1310.39
11.0506	1781.37	1240.09	1536.39	1285.61	1480.94	1194.93	1053.96	1145.98	1584.61	1325.92	1652.33	1554.37	1176.19		1367.61	246.208	93.058	1460.67	1274.56		1406.57	219.738	89.7078	1496.27	1316.86
11.6031	1770.24	1232.63	1540.97	1313.59	1538.36	1197.75	1067.69	1132.07	1582.64	1340.54	1647.89	1520.17	1183.17		1380.18	245.002	92.602	1472.78	1287.57		1401.08	215.211	87.8593	1488.94	1313.22
12.1557	1794.63	1257.3	1532.85	1336.01	1574.03	1202.79	1082.84	1132.68	1596.68	1323.59	1608.18	1473.79	1178.31		1397.21	247.506	93.5483	1490.76	1303.66		1385.54	206.232	84.1937	1469.73	1301.34
12.7082	1830.5	1301.66	1562.05	1341.79	1603.88	1180.98	1107.95	1132.7	1604.12	1330.94	1616.66	1444.44	1165.42		1418.4	257.264	97.2366	1515.64	1321.17		1382.38	209.747	85.6287	1468.01	1296.75
13.2607	1874.77	1341.67	1623.83	1327.22	1656.85	1168.59	1135.41	1139.56	1624.97	1373.85	1662.58	1417.84	1139.02		1446.9	276.387	104.465	1551.37	1342.44		1392.97	226.365	92.4131	1485.38	1300.56
13.8133	1960.89	1397.76	1662.38	1311.03	1712.03	1181.84	1139.17	1136.23	1625.61	1435.11	1706.51	1391.63	1125.48		1480.73	305.157	115.339	1596.07	1365.39		1403.43	241.255	98.4919	1501.92	1304.94
14.3658	2060.34	1445.63	1697.39	1301.16	1729.19	1194.78	1140.39	1119.87	1638.36	1464.42	1719.36	1382.98	1109.23		1509.84	334.105	126.28	1636.12	1383.56		1405.7	255.371	104.255	1509.96	1301.45
14.9183	2081.14	1480.84	1678.45	1308.12	1711.53	1208.71	1139.96	1101.68	1617.23	1456.01	1769.79	1368.52	1100.74		1515.54	332.738	125.763	1641.3	1389.77		1402.33	270.77	110.541	1512.87	1291.79
15.4708	2095.22	1487.29	1661.25	1344.43	1716.97	1227.63	1135.75	1101.8	1598.9	1427.91	1835.49	1352.22	1097.19		1524.08	330.285	124.836	1648.91	1399.24		1402.25	287.353	117.311	1519.56	1284.94
16.0234	2137.58	1452.8	1687.37	1391.27	1730.08	1236.11	1130.75	1124.43	1591.76	1389.09	1828.13	1342.11	1086.72		1537.99	342.656	129.512	1667.51	1408.48		1393.7	281.916	115.092	1508.8	1278.61
16.5759	2215.88	1437.49	1699.02	1413.34	1743.58	1220.41	1162.35	1140.92	1583.38	1369.58	1720.96	1340.98	1074.87		1556.01	363.561	137.413	1693.42	1418.6		1371.78	248.638	101.506	1473.29	1270.27
17.1284	2274.3	1459.42	1784.23	1437.82	1720.27	1206.6	1200.21	1153.82	1550.7	1383.16	1674.56	1338.88	1065.32		1583.26	378.987	143.244	1726.51	1440.02		1361.07	230.493	94.0984	1455.17	1266.98
17.681	2265.35	1476.53	1870.78	1460.63	1684.37	1192.71	1210.94	1169.06	1497.17	1409.01	1652.41	1318.67	1052.83		1594.47	381.845	144.324	1738.8	1450.15		1349.86	218.461	89.1862	1439.04	1260.67
18.2335	2285.09	1484.09	1820.14	1488.97	1636.66	1181.72	1213.11	1170.53	1471.14	1430.32	1638.97	1294.86	1047.84		1587.11	380.439	143.792	1730.9	1443.32		1342.28	214.858	87.7154	1429.99	1254.56
18.786	2356.04	1493.43	1735.88	1512.94	1596.92	1189.47	1195.87	1148.28	1431.5	1447.41	1626.93	1265.99	1057.09		1582.94	395.564	149.509	1732.45	1433.43		1329.53	211.59	86.3812	1415.91	1243.15
19.3386	2391.19	1522.17	1664.42	1523.52	1551.23	1194.52	1157.62	1147.24	1416.52	1488.87	1613.61	1242.72	1086.79		1572.1	408.06	154.232	1726.33	1417.86		1332.63	206.538	84.3188	1416.94	1248.31
19.8911	2473.92	1578.35	1629.85	1547.66	1537.59	1173.41	1142.26	1152.51	1436.07	1485.48	1654.56	1233.17	1112.92		1583.29	439.939	166.281	1749.57	1417.01		1345.78	213.2	87.0386	1432.82	1258.74
20.4436	2611.67	1654.18	1594.21	1582.81	1589.93	1138.12	1138.57	1164.01	1486.69	1485.89	1706.81	1233.17	1105.98		1615.64	491.83	185.894	1801.54	1429.75		1363.76	232.859	95.0643	1458.82	1268.69
20.9961	2685.47	1728.3	1610.74	1634.45	1640.63	1118.02	1139.53	1161.91	1549.88	1487.36	1699.88	1213.16	1100.61		1651.02	520.219	196.624	1847.64	1454.4		1368.8	243.07	99.2328	1468.03	1269.57
21.5487	2644.29	1769.26	1627.49	1686.65	1647.82	1139.62	1152.98	1142.82	1606.98	1472.35	1731.95	1170.84	1094.33		1666.87	501.701	189.625	1856.5	1477.25		1369.88	270.153	110.289	1480.17	1259.59
22.1012	2596.48	1765.68	1629.03	1708.11	1602.77	1196.14	1155.6	1141.15	1654.14	1461.59	1773.26	1165.33	1076.2		1664.83	476.817	180.22	1845.05	1484.61		1378.61	293.897	119.983	1498.59	1258.63
22.6537	2554.01	1729.92	1630.34	1731.82	1546.33	1224.79	1170.68	1148.98	1678.32	1442.92	1744.05	1182.59	1059.82		1655.41	456.761	172.64	1828.05	1482.77		1376.11	289.914	118.357	1494.47	1257.76
23.2063	2532.04	1688.47	1655.65	1747.71	1495.95	1213.59	1184.12	1157.21	1702.15	1437.06	1654.65	1179.84	1066.62		1645.36	450.949	170.443	1815.8	1474.92		1366.26	271.75	110.942	1477.2	1255.31
23.7588	2479.93	1690.72	1633.5	1714.22	1477.08	1209.9	1197.14	1156.42	1714.67	1428.78	1552.44	1200.91	1070.91		1628.93	432.127	163.329	1792.26	1465.6		1354.02	252.059	102.903	1456.92	1251.12
24.3113	2464.11	1722.31	1625.64	1654.51	1490	1225.68	1212.96	1163.66	1746.56	1403.12	1503.96	1238.63	1094.34		1627.89	420.681	159.002	1786.89	1468.88		1358.38	243.248	99.3055	1457.68	1259.07
24.8639	2501.44	1747.42	1649.4	1613.23	1505.22	1212.04	1228.62	1175.12	1788.27	1379.78	1471.29	1251.2	1112.08		1636.77	432.995	163.657	1800.42	1473.11		1362.96	246.422	100.601	1463.56	1262.35
25.4164	2506.9	1767.94	1663.04	1589.66	1488.07	1175.29	1244.13	1182.51	1782.86	1352.19	1450.82	1217.68	1103.67		1633.58	440.91	166.648	1800.23	1466.93		1348.29	246.477	100.624	1448.91	1247.66
25.9689	2514.68	1775.21	1688.04	1568.91	1474.07	1134.01	1264.55	1207.29	1783.03	1323.5	1456.54	1195.79	1110.32		1631.35	449.946	170.064	1801.42	1461.29		1346.08	245.383	100.177	1446.26	1245.9
26.5215	2544.74	1757.13	1657.31	1515.49	1472.56	1121.25	1243.35	1243.46	1770.14	1325.31	1440.46	1178.93	1102.25		1615.97	465.207	175.832	1791.81	1440.14		1343.42	239.604	97.8179	1441.24	1245.61
27.074	2633.53	1728.44	1603.98	1468.56	1484.27	1137.52	1222.08	1279.71	1730.04	1334.38	1405.96	1145.72	1076.5		1611.2	495.178	187.16	1798.36	1424.04		1328.72	230.895	94.2627	1422.98	1234.46
27.6265	2678.35	1702.09	1616.01	1442.72	1504.3	1142.32	1197.99	1291.36	1679.78	1347.83	1372.07	1134.66	1072.48		1611.97	512.753	193.802	1805.77	1418.17		1316.36	214.141	87.4228	1403.79	1228.94
28.179	2560.54	1731.83	1619.07	1441.93	1496.73	1139.82	1201.33	1262.08	1626.6	1375.24	1367.29	1123.64	1107.71		1598.75	473.767	179.067	1777.82	1419.68		1310.43	192.728	78.6808	1389.11	1231.75
28.7316	2444.61	1796.84	1572.49	1448.34	1481.12	1136.29	1210.46	1221.93	1600.44	1378.76	1380.81	1114.19	1140.73		1584.31	438.756	165.834	1750.14	1418.47		1306.14	183.716	75.0018	1381.14	1231.14
29.2841	2338.54	1838.59	1536.56	1467.96	1473.09	1117.61	1229.71	1180.03	1557.76	1353.99	1400.72	1121.71	1160.87		1571.72	409.096	154.624	1726.35	1417.1		1295.85	170.254	69.5058	1365.35	1226.34
29.8366	2297.56	1840.7	1479.34	1480.57	1523.68	1097.47	1248.57	1169.12	1510.29	1339.86	1412.43	1187.57	1134.84		1566.84	397.39	150.199	1717.04	1416.64		1292.35	151.756	61.954	1354.31	1230.4
30.3892	2329.96	1827.07	1465.71	1476.66	1575.92	1058.16	1256.72	1163.08	1464.11	1339.56	1406.46	1267.86	1081.61		1570.03	412.993	156.097	1726.12	1413.93		1287.11	145.813	59.5279	1346.64	1227.58
30.9417	2397.6	1806.69	1477.89	1451.94	1562.67	1029.43	1269.27	1150.94	1456.34	1324.04	1386.78	1288.78	1042.2		1570.78	437.049	165.189	1735.97	1405.6		1274.85	153.336	62.5993	1337.45	1212.25
31.4942	2478.78	1769.63	1475.73	1436.88	1501.54	992.839	1286.68	1155.17	1462.55	1314.98	1359.37	1297.67	1041.17		1563.15	467.276	176.614	1739.77	1386.54		1271.82	150.585	61.476	1333.29	1210.34
32.0468	2570.94	1740.13	1474.51	1461.47	1439.47	969.483	1290.67	1147.81	1469.7	1300.65	1321.44	1294.43	1060.52		1563.81	501.189	189.432	1753.24	1374.38		1265.76	143.363	58.5279	1324.29	1207.23
32.5993	2533.71	1718.37	1502.78	1521.46	1454.15	964.867	1284.56	1137.35	1453.26	1266.71	1302.59	1254.99	1100.3		1568.56	486.259	183.789	1752.35	1384.77		1252.53	126.051	51.4603	1303.99	1201.07
33.1518	2472.86	1724.27	1519.14	1584.19	1457.03	971.844	1263.43	1133.06	1401.88	1226.55	1316.02	1217.07	1125.07		1570.39	466.596	176.357	1746.75	1394.04		1236.61	107.02	43.6909	1280.3	1192.92
33.7043	2451.38	1756.97	1526.26	1598.16	1454.47	989.45	1240.65	1129.81	1383.27	1206.94	1328.88	1169.28	1111.08		1573.91	460.661	174.113	1748.02	1399.79		1221.54	110.669	45.1806	1266.72	1176.36
34.2569	2463.17	1759.88	1542.72	1579.11	1461.04	990.656	1224.16	1158.07	1411	1187.69	1367.58	1126.76	1109.07		1574.39	465.763	176.042	1750.43	1398.35		1226.69	129.516	52.8745	1279.57	1173.82
34.8094	2486.23	1753.37	1582.43	1565.06	1443.23	994.139	1209.02	1187.07	1426.46	1198.8	1387.58	1110.96	1117.77		1576.21	474.519	179.351	1755.56	1396.86		1238.11	136.099	55.5621	1293.67	1182.54
35.3619	2511.28	1750.86	1589.06	1558.48	1420.43	993.172	1184.96	1209.31	1419.69	1189.71	1385.75	1118.4	1115.57		1572.61	486.916	184.037	1756.64	1388.57		1239.74	132.116	53.9359	1293.67	1185.8
35.9145	2533.74	1762.11	1579.85	1567.51	1402.01	1000.72	1170.2	1222.85	1463.32	1175.52	1374.02	1114.7	1098.67		1573.73	496.296	187.582	1761.32	1386.15		1241.51	146.934	59.9856	1301.5	1181.53
36.467	2577.24	1769.81	1551.41	1579.36	1386.41	1030.46	1174.54	1230.09	1508.12	1186.87	1417.56	1114.17	1096.71		1581.32	505.834	191.187	1772.5	1390.13		1258.92	167.664	68.4484	1327.37	1190.47
37.0195	2625.54	1786.49	1530.22	1597.82	1397.58	1061.28	1190.51	1214.97	1541.09	1209.41	1462.84	1114.88	1094.88		1598.49	514.823	194.585	1793.08	1403.91		1273.01	185.5	75.7301	1348.74	1197.28
37.5721	2610.59	1829.3	1502.2	1603.07	1385.5	1105.53	1204.38	1194.97	1586.56	1237.49	1455.07	1123.44	1111.82		1605.8	505.014	190.877	1796.67	1414.92		1284.89	193.037	78.807	1363.7	1206.09
38.1246	2552.41	1871.81	1479.38	1572.8	1399.22	1138.38	1206.75	1169.39	1607.62	1275.07	1391.37	1126.59	1094.68		1602.96	483.777	182.851	1785.82	1420.11		1277.45	194.85	79.5473	1357	1197.91
38.6771	2519.11	1880.24	1442.83	1540.37	1425.39	1145.36	1205.15	1153.97	1583.48	1314.63	1353.59	1128.19	1067.08		1594.06	473.355	178.912	1772.98	1415.15		1266.82	190.755	77.8753	1344.7	1188.95
39.2296	2483.7	1881.91	1418.09	1526.36	1452.99	1129.71	1196.02	1159.66	1542.77	1377.53	1366.65	1152.16	1059.09		1584.11	466.034	176.144	1760.26	1407.97		1276.31	181.994	74.2988	1350.61	1202.01
39.7822	2480.9	1882.33	1450.98	1515.91	1453.86	1105.06	1186.68	1180.23	1531.67	1427.16	1419.71	1168.47	1075.8		1582.24	469.029	177.276	1759.52	1404.97		1300.51	182.25	74.4033	1374.91	1226.1
40.3347	2495.54	1888.02	1457.43	1522	1429.36	1064.28	1189.54	1188.43	1547.89	1415.46	1411.6	1171.71	1079.07		1578.03	481.762	182.089	1760.11	1395.94		1302.36	181.614	74.1438	1376.5	1228.22
40.8872	2498.07	1873.78	1399.42	1527.98	1395.88	1040.97	1192.66	1183.24	1565.27	1395.94	1358.45	1168.07	1051.47		1561.25	489.304	184.939	1746.19	1376.31		1287.07	186.971	76.3307	1363.4	1210.74
41.4398	2486.48	1888.21	1352.34	1547.11	1370.37	1046.37	1175.72	1160.34	1583.94	1389.63	1292.75	1185.77	1060.85		1552.37	492.682	186.216	1738.59	1366.16		1278.88	187.499	76.546	1355.43	1202.34
41.9923	2485.76	1905.32	1300.74	1563.54	1362.15	1068.58	1150.04	1140.39	1597.68	1366.52	1265.93	1199.45	1103.03		1548.02	498.533	188.428	1736.45	1359.59		1278.84	182.151	74.3629	1353.2	1204.47
42.5448	2470.96	1903.66	1253.57	1557.78	1340.53	1084.04	1140.91	1118.08	1590.29	1343.63	1304.19	1203.62	1125.31		1535.92	498.019	188.233	1724.15	1347.69		1280.85	177.141	72.3175	1353.17	1208.54
43.0974	2469.38	1877.91	1244.46	1541.31	1312.03	1099.43	1134.04	1107.66	1575.51	1310.36	1350.72	1215.1	1133.31		1525.51	495.762	187.38	1712.89	1338.13		1282.11	172.426	70.3926	1352.5	1211.72
43.6499	2440.08	1883.63	1257.65	1534.33	1297.13	1092.82	1125.48	1088.09	1535.95	1309.99	1405.05	1238.34	1146.31		1518.73	489.15	184.881	1703.61	1333.85		1287.29	166.233	67.8642	1355.15	1219.43
44.2024	2413.36	1975.9	1230.63	1550.05	1329.9	1068.89	1135.37	1082.07	1518.69	1329.65	1401.77	1251.14	1145.46		1529.16	496.247	187.564	1716.72	1341.59		1288.13	162.47	66.328	1354.46	1221.8
44.7549	2441.06	2123.39	1220.51	1558.29	1368.58	1040.18	1146.64	1106.64	1532.58	1363.21	1378.95	1250.03	1120.93		1556.95	530.186	200.391	1757.34	1356.56		1292.06	164.859	67.3033	1359.36	1224.75
45.3075	2464.52	2189.07	1206.61	1553.77	1388.34	1015.42	1156.59	1108.33	1584.99	1343.16	1358.08	1198.84	1103.58		1567.76	551.84	208.576	1776.34	1359.18		1282.83	184.519	75.3297	1358.16	1207.5
45.86	2427.01	2124.56	1237.21	1543.09	1392.76	988.039	1159.98	1078.42	1673.86	1318.4	1315.52	1136.73	1074.3		1553.23	530.678	200.577	1753.81	1352.66		1266.2	228.12	93.1296	1359.33	1173.08
46.4125	2381.19	2012.79	1271.98	1527.61	1389.61	960.711	1148.62	1050.56	1728.19	1324.07	1252.61	1112.68	1050.68		1527.5	502.227	189.824	1717.33	1337.68		1253.13	257.863	105.272	1358.4	1147.86
46.9651	2360.94	1924.54	1257.34	1524.77	1393.4	954.528	1148.45	1033.27	1712.43	1300.42	1193.69	1158.5	1031.38		1509.14	485.26	183.411	1692.55	1325.73		1238.28	253.721	103.581	1341.86	1134.7
47.5176	2309.61	1846.8	1222.18	1549.44	1422.61	981.883	1140.66	1038.1	1647.29	1290.2	1166.02	1230.87	1007.44		1496.17	458.042	173.124	1669.29	1323.04		1229.99	231.605	94.5524	1324.54	1135.43
48.0701	2290.16	1786.83	1208.19	1597.15	1458.96	1015.27	1140.3	1061.18	1647.01	1325.15	1144.44	1257.61	1013.44		1499.55	441.068	166.708	1666.26	1332.84		1241.47	230.496	94.0995	1335.57	1147.37
48.6227	2266.77	1776.85	1197.7	1652.62	1483.28	1047.31	1151.15	1072.09	1692.72	1363.81	1144.44	1242.03	1001.87		1510.81	429.213	162.227	1673.04	1348.58		1252.83	250.332	102.198	1355.02	1150.63
49.1752	2228.69	1794.6	1222.83	1690.51	1496.77	1057.67	1156.09	1047.99	1716.36	1387.72	1143.07	1213.85	998.272		1521.02	416.683	157.491	1678.52	1363.53		1251.21	265.843	108.53	1359.74	1142.68
49.7277	2183.87	1827.81	1273.09	1709.98	1499.12	1060.09	1142.72	1022.21	1709.3	1383.06	1118.24	1184.85	1010.29		1528.1	405.455	153.247	1681.35	1374.85		1237.99	267.862	109.354	1347.34	1128.64
50.2803	2205.89	1892.07	1306.45	1692.19	1451.18	1059.94	1127.32	1015.1	1672.52	1358.81	1106.92	1173.23	1050.94		1533.58	419.013	158.372	1691.95	1375.21		1229.59	248.609	101.494	1331.08	1128.09
50.8328	2285.01	1960.87	1251.69	1654.58	1440.03	1057.59	1118.37	1035.51	1630.88	1324.12	1099.21	1154.36	1119.37		1538.31	456.232	172.439	1710.75	1365.87		1227.24	220.189	89.8917	1317.13	1137.35
51.3853	2318.02	1991.17	1237.42	1629.71	1430.54	1031.33	1115.37	1072.51	1595.81	1319.37	1131.43	1102.37	1192.75		1536.22	475.991	179.908	1716.13	1356.31		1235.71	196.876	80.3743	1316.08	1155.33
51.9378	2299.29	1957.06	1230.5	1588.46	1431.5	1015.32	1111.76	1102.73	1595.31	1347.84	1165.17	1049.62	1249.79		1519.13	468.332	177.013	1696.14	1342.11		1251.74	198.911	81.2052	1332.95	1170.54
52.4904	2328.48	1913.95	1246.23	1544.4	1402.28	990.972	1124.39	1123.53	1578.09	1374.53	1171.29	1001.72	1301.41		1507.24	471.431	178.184	1685.43	1329.06		1258.43	204.549	83.5066	1341.94	1174.92
53.0429	2383.24	1900.59	1254.11	1533.09	1344.39	969.911	1137.06	1104.61	1567.91	1374.35	1155.7	949.061	1322.28		1503.2	489.729	185.1	1688.3	1318.1		1245.65	220.106	89.858	1335.51	1155.79
53.5954	2397.69	1919.17	1262.48	1562.02	1348.79	962.717	1150.77	1079.69	1587.18	1376.26	1139.01	916.311	1350.89		1514.8	495.61	187.323	1702.13	1327.48		1241.56	241.683	98.6666	1340.22	1142.89
54.148	2384.78	1951.83	1246.71	1613.63	1383.97	958.467	1166.61	1086.39	1567.77	1376.58	1091.87	925.078	1334.48		1529.43	495.961	187.456	1716.88	1341.97		1230.36	236.294	96.4665	1326.83	1133.9
54.7005	2348.04	1999.48	1247.68	1628.27	1420.48	967.261	1161.2	1101.96	1509.26	1388.77	1042.76	936.239	1294.06		1538.92	490.423	185.363	1724.28	1353.55		1212.17	220.518	90.026	1302.2	1122.15
55.253	2341.18	2029.18	1236.82	1629.14	1460.93	967.639	1139.75	1108.72	1436.28	1425.46	1034.75	937.378	1294.69		1543.52	495.819	187.402	1730.92	1356.12		1206.21	209.764	85.6357	1291.85	1120.58
55.8055	2296.32	2029.19	1246.78	1627.19	1465.03	988.789	1110.01	1123.02	1382.75	1469.11	1097.07	942.45	1316.76		1537.61	482.909	182.523	1720.14	1355.09		1221.86	199.718	81.5347	1303.39	1140.33
56.3581	2287.58	2007.65	1272.79	1612.56	1455.02	987.489	1094.27	1133.58	1380.09	1489.42	1196.08	953.844	1335.89		1531.05	476.941	180.267	1711.32	1350.78		1248.15	192.755	78.6921	1326.84	1169.46
56.9106	2277.31	1986.59	1268.72	1593.84	1435.81	974.2	1096.51	1131.76	1400.32	1432.85	1207.19	972.506	1333.51		1519	473.311	178.895	1697.89	1340.1		1246.36	176.488	72.051	1318.41	1174.3
57.4631	2295.54	1986.63	1254.2	1582.59	1390.13	969.478	1100.33	1120.59	1411.52	1345.18	1199.64	980.056	1295.63		1511.27	481.197	181.875	1693.15	1329.4		1225.44	158.595	64.7463	1290.18	1160.69
58.0157	2312.91	2010.36	1242.89	1564.65	1353.46	977.839	1113.37	1137.89	1426.49	1272.02	1193.99	976.978	1220.04		1510.78	488.94	184.802	1695.59	1325.98		1204.57	148.588	60.6609	1265.23	1143.91
58.5682	2265.59	2019.29	1262.04	1521.42	1368.17	1000.38	1100.61	1171.93	1459.49	1238.61	1181.22	968.772	1140.97		1505.36	472.439	178.565	1683.92	1326.79		1193.5	159.162	64.9775	1258.48	1128.52
59.1207	2210.04	2018.44	1265.72	1458.48	1404.28	1001.93	1093.67	1178.86	1507.29	1210.69	1151.77	947.461	1106.41		1493.22	456.721	172.624	1665.85	1320.6		1183.75	183.447	74.8921	1258.64	1108.85
59.6733	2167.35	2038.81	1252.02	1430.91	1406.67	983.233	1094.27	1167.57	1521.21	1181.98	1149.24	937.911	1115.79		1481.89	454.611	171.827	1653.72	1310.07		1178.95	189.868	77.5132	1256.46	1101.44
60.2258	2140.52	2054.41	1240.51	1423.34	1380.63	958.878	1076.06	1155.64	1532.12	1169.56	1166.58	945.328	1140.59		1467.76	460.138	173.916	1641.68	1293.85		1184.97	190.446	77.7493	1262.72	1107.22
60.7783	2132.94	2059.08	1223.86	1426.28	1393.28	940.522	1076.98	1173.07	1541.25	1176.22	1188.26	963.861	1177.37		1464.71	463.592	175.221	1639.93	1289.49		1203.34	186.594	76.1768	1279.51	1127.16
61.3309	2128.29	2081.03	1208.87	1427.48	1400.8	926.267	1071.38	1186.76	1505.11	1175.87	1206.72	997.672	1216.54		1463.45	471.829	178.334	1641.78	1285.11		1214.78	163.582	66.7821	1281.56	1148
61.8834	2149.46	2109.12	1212.34	1429.97	1379.37	909.783	1069.43	1188.9	1504.13	1154.66	1242.58	1035.1	1229.49		1465.64	486.57	183.906	1649.54	1281.73		1225.81	155.277	63.3914	1289.2	1162.42
62.4359	2154.57	2093.37	1214.73	1424.14	1372.79	894.433	1061.87	1179.24	1546.51	1127.12	1253.08	1058.92	1208.45		1459.41	488.366	184.585	1644	1274.83		1228.89	169.468	69.1849	1298.07	1159.7
62.9884	2110.2	2035.92	1219.88	1398.74	1364.74	872.994	1065.68	1189.86	1569.8	1098.97	1234.03	1051.99	1151.06		1438.31	469.342	177.395	1615.7	1260.91		1215.95	184.93	75.4973	1291.45	1140.45
63.541	2078.11	1954.91	1236.47	1360.45	1347.65	883.578	1075.25	1194.06	1527.81	1082.45	1188.99	1018.64	1091.97		1419.49	441.268	166.784	1586.27	1252.7		1183.99	181.359	74.0397	1258.03	1109.95
64.0935	2053.39	1870.69	1250.93	1342.25	1342.52	931.033	1071.65	1170.52	1482.88	1082.39	1174.03	979.561	1078.91		1408.92	409.17	154.652	1563.57	1254.27		1161.38	173.034	70.6407	1232.02	1090.74
64.646	2067.04	1818.82	1256.33	1346.86	1347.71	967.217	1062.39	1155.49	1432.43	1104.63	1207.4	971.139	1074.44		1409.48	397.325	150.175	1559.66	1259.31		1157.59	156.527	63.9018	1221.49	1093.69
65.1986	2000.39	1821.8	1287.37	1350.02	1354.07	968.239	1053.97	1164.69	1398.68	1114.69	1260.45	994.083	1063.93		1405.12	378.956	143.232	1548.35	1261.89		1166.09	145.374	59.3487	1225.44	1106.74
65.7511	1958.99	1834.24	1273.53	1360.46	1368.15	968.972	1041.55	1162.88	1371.35	1143.7	1303.21	972.961	1077.16		1400.84	372.798	140.905	1541.75	1259.94		1171.88	145.912	59.5684	1231.45	1112.31
66.3036	1964.43	1845.47	1276.34	1378.24	1375.56	986.967	1043.41	1144.02	1339.52	1180.87	1250.44	936.706	1098.88		1410.06	372.029	140.614	1550.67	1269.45		1158.41	137.607	56.1778	1214.58	1102.23
66.8562	1981.3	1839.45	1260.42	1385.83	1380.69	996.106	1040.83	1127.93	1333.83	1185.29	1157.51	905.183	1094.43		1412.09	374.654	141.606	1553.69	1270.48		1134.03	139.339	56.8848	1190.91	1077.14
67.4087	1963.46	1827.24	1251.94	1374.74	1394.76	992.617	1034.11	1098.67	1359.4	1146.27	1121.62	887.244	1073.99		1405.55	370.187	139.917	1545.47	1265.63		1114.53	151.376	61.7989	1176.33	1052.73
67.9612	1957.74	1859.36	1258.92	1343.93	1379.27	1001.38	1020.77	1060.48	1389.14	1111.44	1098.79	901.861	1048.51		1403.05	375.99	142.111	1545.16	1260.94		1101.7	159.494	65.1132	1166.82	1036.59
68.5137	1969.27	1917.19	1292.34	1313.01	1379.57	1014.62	1007.91	1036.7	1404.21	1117.11	1081.36	877.561	1038.69		1413.42	389.899	147.368	1560.78	1266.05		1092.6	173.262	70.7339	1163.34	1021.87
69.0663	1976.92	1979.76	1305.62	1290.65	1403.74	1009.99	998.794	1011.23	1450.54	1161.69	1089.62	801.472	1050.35		1423.64	408.044	154.226	1577.86	1269.41		1094.15	212.627	86.8045	1180.96	1007.35
69.6188	1975.24	2017.63	1286.75	1276.28	1391.93	979.25	984.528	995.967	1498.94	1199.22	1096.42	758.233	1050.03		1415.95	425.918	160.982	1576.93	1254.96		1099.8	244.595	99.8557	1199.66	999.945
70.1713	2009.41	1998.38	1306.68	1280.18	1387.94	957.406	994.022	991.883	1523.94	1199.26	1077.33	762.983	1035.86		1419.15	430.271	162.627	1581.77	1256.52		1098.54	252.769	103.193	1201.73	995.348
70.7239	1990.83	1947.02	1302.71	1291.93	1362.45	952.6	1014.16	982.922	1505.21	1220.68	1042.61	768.461	1029.21		1408.81	412.183	155.791	1564.6	1253.02		1091.51	249.1	101.694	1193.21	989.82
71.2764	2042.97	1929.49	1273.39	1318.21	1335.81	943.767	1019.75	976.478	1503.07	1200.51	1036.02	779.578	1054.38		1409.05	422.843	159.82	1568.87	1249.24		1091.67	243.413	99.3731	1191.05	992.299
71.8289	2193.69	1925.65	1264.52	1336.18	1325.67	938.594	1013.17	992.639	1525.96	1137.11	1041.19	791.8	1074.47		1428.21	463.892	175.335	1603.55	1252.88		1093.86	242.163	98.8624	1192.72	994.997
72.3815	2183.14	1945.62	1270.92	1323.48	1311.99	951.394	1021.29	1012.07	1536.47	1111.21	1035.4	811.544	1080.75		1429.69	461.84	174.559	1604.25	1255.13		1097.91	239.201	97.6534	1195.56	1000.25
72.934	2092.87	1970.22	1215.78	1311.09	1284.6	966.439	1028.25	1031.84	1500.42	1121.91	1016.67	849.017	1064.13		1409.89	444.573	168.033	1577.93	1241.86		1097.33	217.55	88.8143	1186.14	1008.52
73.4865	2011.83	1962.98	1139.46	1314.36	1272.6	947.744	1031.08	1060.12	1474.87	1164.83	992.356	876.25	1034.08		1382.87	432.302	163.395	1546.26	1219.47		1100.42	206.067	84.1264	1184.54	1016.29
74.039	1992.6	1955.34	1087.6	1322.26	1281.89	913.339	1015.19	1085.07	1506.82	1231.39	974.528	861.133	1012.52		1366.89	438.636	165.789	1532.68	1201.1		1111.91	229.168	93.5575	1205.47	1018.35
74.5916	1967.45	1923.68	1068.7	1321.49	1291.49	892.378	997.056	1081.37	1505.14	1268.33	965.767	838.583	1023.52		1351.75	433.53	163.859	1515.61	1187.89		1113.79	238.281	97.2778	1211.06	1016.51
75.1441	1948.03	1894.59	1096.39	1309.43	1271.72	887.822	1002.73	1059.69	1499.57	1261.03	972.683	809.889	1024.63		1344.39	420.374	158.887	1503.27	1185.5		1104.58	242.132	98.8498	1203.43	1005.73
75.6966	1971.39	1857.96	1108.58	1304.86	1224.89	895.806	1006.22	1042.88	1478.29	1222.93	977.572	781.361	1017.64		1338.53	417.069	157.637	1496.17	1180.89		1086.78	238.216	97.2515	1184.03	989.529
76.2492	1975.52	1841.66	1114.32	1316.07	1211.39	907.283	1001.86	1033.07	1430.07	1153.75	982.489	783.444	1034.08		1338.3	413.351	156.232	1494.53	1182.07		1069.48	214.05	87.3856	1156.87	982.098
76.8017	1919.51	1849.32	1081.47	1309.32	1199.61	919.317	1002.73	1036.03	1424.87	1085.61	968.756	791.411	1074.31		1325.9	402.505	152.133	1478.03	1173.76		1063.5	207.344	84.648	1148.15	978.849
77.3542	1869.24	1857.64	1072.94	1306.09	1161.98	929.956	1014.39	1063.94	1439.72	1072.2	958.561	747.822	1088.48		1316.03	392.077	148.191	1464.23	1167.84		1061.79	224.896	91.8133	1153.6	969.975
77.9068	1864.87	1836.44	1092.13	1316.63	1125.96	928.939	1037.03	1073.63	1400.2	1094.03	954.644	701.256	1109.63		1314.57	384.269	145.24	1459.81	1169.33		1055.56	227.694	92.9556	1148.52	962.609
78.4593	1890.82	1785.6	1110.42	1339.27	1103.18	933.433	1069.9	1061.11	1336.19	1145.24	938.578	697.817	1125.44		1318.95	375.477	141.917	1460.86	1177.03		1050.73	215.98	88.1736	1138.9	962.556
79.0118	1870.37	1748.44	1125.06	1376.96	1122.41	947.172	1086.78	1047.92	1303.15	1186.77	911.039	711.694	1113.96		1325.31	355.891	134.514	1459.83	1190.8		1045.76	210.019	85.7398	1131.5	960.016
79.5644	1846.99	1753.14	1110.52	1406.46	1139.17	947.494	1079.61	1037.38	1296.98	1236.97	931.25	734.622	1098.81		1326.2	352.532	133.245	1459.44	1192.95		1056	205.839	84.0333	1140.04	971.969
80.1169	1815.87	1779.84	1078.78	1405.54	1135.74	914.683	1060.04	1022.65	1293.23	1246.18	976.517	749.889	1050.12		1312.93	362.471	137.001	1449.93	1175.93		1056.43	196.781	80.3356	1136.77	976.096
80.6694	1781.77	1794.81	1084.67	1380.77	1148.74	885.25	1045.09	1012.03	1351.51	1237.15	1012.34	769.889	975.272		1303.01	362.776	137.117	1440.13	1165.9		1059.7	206.045	84.1177	1143.81	975.58
81.2219	1725.03	1763.16	1089.57	1353.93	1175.41	876.417	1045.12	1003.81	1414.71	1242.82	1044.53	776.972	906.511		1289.8	341.941	129.241	1419.05	1160.56		1064.89	230.719	94.1906	1159.08	970.699
81.7745	1687.12	1728.19	1074.04	1317.2	1231.59	884.4	1034.22	998.911	1435.3	1269.49	1067.52	788.772	880.5		1279.54	323.952	122.442	1401.98	1157.09		1073.42	242.169	98.8651	1172.28	974.551
82.327	1753.25	1731.43	1063.36	1263.42	1237.44	899.75	1020.09	989.567	1465.12	1289.49	1074.02	833.722	888.956		1281.25	338.848	128.073	1409.32	1153.18		1090.15	243.7	99.49	1189.64	990.656
82.8795	1819.78	1762.7	1038.47	1228.17	1222.83	925.089	1013.53	987.328	1484.12	1319.16	1077.28	878.517	877.183		1287.22	361.769	136.736	1423.96	1150.49		1103.93	247.952	101.226	1205.16	1002.71
83.4321	1824.24	1820.13	1012.15	1214.57	1204.97	952.906	1021.54	981.717	1461.42	1345.08	1066.15	927.017	871.844		1292.93	374.658	141.607	1434.54	1151.32		1108.87	239.722	97.8663	1206.74	1011.01
83.9846	1775.08	1869.78	990.767	1182.52	1176.75	980.383	1009.92	982.267	1424.33	1321.86	1069.62	962.756	907.717		1283.6	378.459	143.044	1426.64	1140.56		1111.43	211.765	86.4526	1197.88	1024.97
84.5371	1732.14	1878.51	994.744	1138.56	1154.88	992.233	990.944	1012.69	1390.77	1282.43	1040.67	992.294	940.911		1268.86	375.316	141.856	1410.72	1127		1109.96	181.815	74.2257	1184.19	1035.73
85.0897	1731.8	1837.28	983.4	1110.51	1154.27	1004.71	988.789	1071.24	1415.97	1279.01	1027.41	1004.88	978.7		1258.68	366.196	138.409	1397.09	1120.27		1129.54	176.92	72.2275	1201.76	1057.31
85.6422	1737.84	1778.59	988.372	1122.8	1135.53	1011.94	994.533	1089.47	1424.49	1273.61	1039.68	980.406	1022.5		1252.8	350.478	132.468	1385.27	1120.33		1138.36	173.589	70.8673	1209.23	1067.49
86.1947	1769.92	1727.29	983.528	1182.03	1112.69	1030.17	995.144	1090.32	1372.74	1271.03	1039.31	926.156	1074.22		1257.25	342.908	129.607	1386.86	1127.65		1128.96	163.261	66.6509	1195.61	1062.31
86.7472	1839.39	1703.77	983.556	1243.11	1108.13	1061.01	988.039	1098.8	1322.71	1253.69	1006.56	903.45	1077.96		1275.29	352.212	133.123	1408.41	1142.16		1110.53	155.181	63.3525	1173.88	1047.18
87.2998	1854.38	1691.69	996.672	1258.84	1059.26	1041.88	968.922	1102.68	1342.89	1240.06	988.606	899.7	1031.45		1267.38	360.835	136.383	1403.76	1131		1100.9	164.828	67.2906	1168.19	1033.61
87.8523	1808.54	1654.57	1025.01	1256.98	994.833	1003.66	949.006	1091.79	1387.37	1265.47	958.25	894.544	990.539		1241.8	351.717	132.937	1374.74	1108.86		1097.99	191.984	78.3771	1176.37	1019.62
88.4048	1772.16	1632.76	1020.47	1234.83	985.422	974.072	943.761	1065.28	1410.57	1271.19	939.933	884.911	961.789		1223.35	343.274	129.745	1353.1	1093.61		1088.95	208.432	85.0918	1174.04	1003.85
88.9574	1719.4	1646.81	1009.84	1158.31	1002.28	952.85	941.283	1033.31	1407.69	1271.67	944.394	885.922	946.478		1204.4	335.233	126.706	1331.1	1077.69		1081.58	209.84	85.667	1167.24	995.909
89.5099	1694.69	1677.04	1000.47	1091.78	1004.37	937.944	942.483	1011.19	1407.28	1275.07	947.522	855.706	945.167		1192.68	340.76	128.795	1321.48	1063.89		1073.66	217.115	88.6369	1162.29	985.02
90.0624	1646.67	1711.21	998.989	1064.94	1003.94	923.017	942.661	996.217	1434.86	1237.78	954.628	821.861	967.911		1184.49	341.367	129.024	1313.51	1055.46		1068.88	224.505	91.6536	1160.53	977.222
90.615	1616.36	1763.99	980.622	1051.32	981.256	899.978	948.456	977.078	1476.92	1191.88	978.122	819.739	971.556		1177.43	355.727	134.452	1311.88	1042.97		1069.22	232.308	94.8394	1164.06	974.377
91.1675	1624.26	1803.43	953.922	1041.79	1005.19	889.178	947.094	965.9	1479.03	1121.31	997.05	825.994	970.456		1180.7	370.95	140.206	1320.9	1040.49		1059.96	225.804	92.1841	1152.14	967.772
91.72	1668.36	1803.77	911.028	1047.78	1031.7	882.3	952.767	974.2	1430.54	1073.7	990.078	807.172	976.55		1185.39	382.852	144.705	1330.09	1040.68		1042.04	209.135	85.3792	1127.42	956.661
92.2725	1716.02	1771.59	870.267	1056.55	1051.81	879.194	971.683	975.911	1377.53	1082.06	1006.01	788.056	986.128		1188.16	386.938	146.249	1334.41	1041.91		1035.95	193.513	79.0014	1114.95	956.947
92.8251	1743.92	1751.48	866.4	1059.84	1066.54	853.117	980.817	949.1	1323.63	1113.97	1039.16	796.383	1019.78		1188.87	390.773	147.698	1336.57	1041.17		1040.34	175.465	71.6333	1111.97	968.703
93.3776	1732.99	1760.63	877.683	1068.52	1065.05	812.183	977.361	918.45	1283.43	1121.78	1049.08	787.478	1034.08		1184.92	395	149.296	1334.21	1035.62		1032.38	169.857	69.3438	1101.73	963.04
93.9301	1711.8	1727.06	884.406	1077.05	1061.91	777.444	977.172	914.083	1318.32	1134.65	1055.06	760.189	1034.96		1173.83	386.636	146.135	1319.97	1027.7		1036.21	190.123	77.6175	1113.83	958.593
94.4827	1732.53	1690.3	881.522	1082.3	1074.45	761.7	960.139	935.839	1376.96	1174.22	1022.32	731.306	992.656		1168.99	386.854	146.217	1315.21	1022.77		1038.88	219.201	89.4886	1128.37	949.395
95.0352	1730.25	1699.91	891.028	1094.89	1093.83	764.489	934.8	960.128	1391.93	1233.87	980.222	715.539	925.694		1172.74	388.085	146.682	1319.43	1026.06		1034.56	240.647	98.2436	1132.81	936.319
95.5877	1693.72	1705.49	912.122	1115.34	1101.92	767.889	916.606	966.306	1332.56	1236.57	956.111	714.283	909.9		1173.3	378.809	143.176	1316.47	1030.12		1019.29	226.777	92.5814	1111.87	926.706
96.1403	1670.35	1691.89	886.456	1111.66	1099.58	781.011	908.839	957.611	1273.88	1216.38	909.811	722.489	956.461		1164.25	372.103	140.642	1304.9	1023.61		1006.1	205.155	83.7544	1089.86	922.35
96.6928	1681.34	1681.07	866.956	1094.26	1064.01	789.056	903.561	949.85	1257.81	1192.74	884.35	721.283	1017.92		1154.32	375.468	141.913	1296.24	1012.41		1003.99	198.702	81.1198	1085.11	922.873
97.2453	1684.38	1668.54	865.711	1084.47	1028.89	775.022	883.133	940.433	1288.64	1186.67	905.589	691.661	996.639		1141.45	379.812	143.556	1285.01	997.894		1001.61	212.458	86.7357	1088.34	914.871
97.7978	1673.86	1650.09	855.406	1088.73	1002.04	739.533	869.65	927.8	1399.36	1188.23	967.772	663.972	934.244		1125.61	382.941	144.738	1270.35	980.876		1013.56	251.916	102.844	1116.41	910.72
98.3504	1652.89	1629.44	843.506	1097.91	989.139	710.456	867.533	906.056	1461.87	1196.26	1036.11	660.317	913.639		1112.98	380.5	143.815	1256.8	969.166		1029.04	275.591	112.509	1141.55	916.532
98.9029	1626.27	1626.93	842.822	1098.71	988.928	691.594	864.594	890.35	1468.68	1201.81	1054.49	671.372	911.772		1105.69	377.51	142.686	1248.38	963.007		1033.08	277.344	113.225	1146.31	919.855

## Sheet: Figure 7K and L
Figure 7K and 7L: SOX9+ MZG at the IHF pial surface in C57 and BTBR mice
	C57 SOX9+ MZG n1	C57 SOX9+ MZG n2	C57 SOX9+ MZG n3	C57 SOX9+ MZG n4	C57 SOX9+ MZG n5	C57 SOX9+ MZG n6	BTBR SOX9+ MZG n1	BTBR SOX9+ MZG n2	BTBR SOX9+ MZG n3	BTBR SOX9+ MZG n4	BTBR SOX9+ MZG n5	BTBR SOX9+ MZG n6
0-50	21	27	21	29	21	40	37	37	37	33	41	42
50-100	19	25	27	17	22	23	33	41	35	27	41	40
100-150	11	20	24	22	17	13	31	35	24	24	32	28
150-200	8	16	15	19	13	11	22	23	19	18	21	31
200-250	12	14	16	17	9	11	16	18	22	13	14	14
250-300	8	13	10	13	13	9	6	10	9	11	17	9
TOTAL	79	115	113	117	95	107	145	164	146	126	166	164
