# Supplementary material for: DRAXIN regulates interhemispheric fissure remodelling to influence the extent of corpus callosum formation
Source: eLife. 2021 May 4;10:e61618. doi: 10.7554/eLife.61618 (PMC8137145; doi:10.7554/eLife.61618)
Supplement: Figure 8—figure supplement 1—source data 1. [file elife-61618-fig8-figsupp1-data1.xlsx]

## Sheet: Sheet1
Figure 8-figure supplement 1: Volume of the base of the IHF in BTBR and C57 mice (micron cubed)
E12-E13 C57	E12-E13 BTBR	E13-E14 C57	E13-E14 BTBR	E14-E15 C57	E14-E15 BTBR
74216.6	499892	173856	360358	770882	488674
346197	662418	137577	367599	1760000	486193
31468.2	272757	59740.5	424594	1390000	925586
70930.7	243104	98915.3	641698	1240000	394312
130393	89867.6	168764	748179		572649
74755.6	810549	198275	113342		484234
351734	661388	155623			582824
	407209	140546
		187959
		203008
