# Supplementary material for: DRAXIN regulates interhemispheric fissure remodelling to influence the extent of corpus callosum formation
Source: eLife. 2021 May 4;10:e61618. doi: 10.7554/eLife.61618 (PMC8137145; doi:10.7554/eLife.61618)
Supplement: Figure 8—source data 1. [file elife-61618-fig8-data1.xlsx]

## Sheet: Figure 8E
Figure 8E: Total telencephalic midline length in E13-E15 C57 and BTBR horizontal tissue sections
E13 C57 telencephalic midline length (microns)	E13 BTBR telencephalic midline length (microns)	E14 C57 telencephalic midline length (microns)	E14 BTBR telencephalic midline length (microns)	E15 C57 telencephalic midline length (microns)	E15 BTBR telencephalic midline length (microns)
1158.14	1119.41	1209.91	1300.89	1303.11	1388.22
1137.47	1074.92	1241.32	1183.39	1425.52	1419.58
1169.49	1046.93	1226.98	1211.73	1378.02	1307.67
1170.32	1200.73	1295.5	1204.8	1316.86	1363.52
1158.83	1233.3	1255.68	1266.17		1408.34
1159.56	1071.27	1197.51	1148.5		1369.62
1162.98	1068.65	1258	1251.37		1398.45
	1149.75	1247.76	1295.67		1328.04
		1183.98

## Sheet: Figure 8F-H
Figure 8F-H: Percent EdU+ and Ki67+ MZG within the telencephalic hinge of BTBR and C57 mice following a 24 hour EdU pulse
8F: Percent EdU+/DAPI+ MZG
E12-E13 C57	E12-E13 BTBR	E13-E14 C57	E13-E14 BTBR	E14-E15 C57	E14-E15 BTBR
39.391	48	28.0856	29.4311	18.6834	28.8571
30.109	38.863	27.2727	33.8298	11.9003	26.4716
38.15	31.25	26.783	33.3333	20.3524	22.0245
45.105	28.393	25.2121	36.655	23.3144	26.6464
35.061	39.004	23.7999	35.8345		37.0617
44.603	42.731	30.1313	38.7031		30.4962
	44.878	31.075	35.2041		27.0588
	34.709	37.1573
		27.02
8G: Percent EdU+/KI67+ MZG
E12-E13 C57	E12-E13 BTBR	E13-E14 C57	E13-E14 BTBR	E14-E15 C57	E14-E15 BTBR
29.8969	24.5726	18.3857	18.4015	24.8139	14.2574
26.7148	30.4878	19.1358	17.9245	35.0785	14.69
29.9003	22.9091	14.9425	20.3833	18.9046	9.15619
33.9518	27.3585	16.3462	17.6471	20.5575	10.5714
29.1304	33.6026	16.5605	14.09		14.3713
28.9193	31.6568	9.40367	16.5785		14.8148
	26.9022	10.1744	16.1232		13.6432
	29.1262	8.34951
		13.1579
8H: Percent EdU+/KI67- MZG
E12-E13 C57	E12-E13 BTBR	E13-E14 C57	E13-E14 BTBR	E14-E15 C57	E14-E15 BTBR
70.1031	75.4274	81.6143	81.5985	75.1861	85.7426
73.2852	69.5122	80.8642	82.0755	64.9215	85.31
70.0997	77.0909	85.0575	79.6167	81.0954	90.8438
66.0482	72.6415	83.6538	82.3529	79.4425	89.4286
70.8696	66.3974	83.4395	85.91		85.6287
71.0807	68.3432	90.5963	83.4215		85.1852
	73.0978	89.8256	83.8768		86.3568
	70.8738	91.6505
		86.8421

## Sheet: Figure 8I
Figure 8I-K: EdU+ and Ki67+ cells within the IHF in BTBR and C57 mice following a 24 hour EdU pulse
8I: EdU-positive cells within the base of the IHF in BTBR and C57 mice
E12-E13 C57	E12-E13 BTBR	E13-E14 C57	E13-E14 BTBR	E14-E15 C57	E14-E15 BTBR
4	85	32	41	143	88
20	68	28	69	137	87
5	36	21	38	94	156
1	42	25	79	230	51
12	23	28	74		133
4	70	34	82		111
1	90	19	21		126
	42	25
		35

## Sheet: 8J
8J: Density of EdU+/Ki67+ cells within the base of the IHF in BTBR and C57 mice (micron cubed)
E12-E13 C57	E12-E13 BTBR	E13-E14 C57	E13-E14 BTBR	E14-E15 C57	E14-E15 BTBR
2.69e-05	6.201e-05	0.0001208	0.0001231	4.8e-05	5.73e-05
1.16e-05	6.038e-05	8.722e-05	0.0001027	2.38e-05	3.7e-05
3.18e-05	9.166e-05	0.0001841	5.985e-05	2.16e-05	3.03e-05
1.41e-05	7.816e-05	0.0001011	0.0001178	4.93e-05	1.01e-05
4.6e-05	0.0001447	6.518e-05	7.013e-05		4.89e-05
2.68e-05	5.182e-05	8.574e-05	7.351e-05		5.58e-05
	8.921e-05	5.141e-05	9.705e-05		6.35e-05
	6.385e-05	0.000121
		0.0001064

## Sheet: 8K
8K: Density of EdU+/Ki67- cells within the base of the IHF in BTBR and C57 mice (micron cubed)
E12-E13 C57	E12-E13 BTBR	E13-E14 C57	E13-E14 BTBR	E14-E15 C57	E14-E15 BTBR
2.6948e-05	0.00010802	6.3271e-05	8.8801e-05	0.0001375	0.00012278
4.6216e-05	4.2269e-05	0.0001163	4.3526e-05	5.3927e-05	0.00014192
0.00012711	4.0329e-05	0.00016739	6.8301e-05	4.616e-05	0.00013829
0	9.461e-05	0.00015164	4.5193e-05	0.00013648	0.00011919
4.6015e-05	0.00011127	0.00010073	3.6088e-05		0.00018336
2.6754e-05	3.4544e-05	8.574e-05	8.8229e-05		0.00017347
		7.0684e-05			0.0001527
	4.6871e-05	5.6921e-05
	3.9292e-05	7.9805e-05
		7.8815e-05
